# Supplementary material for: Platinum-catalysed intermolecular addition of carbonyl compounds to 1,6-enynes: investigation of a new reaction pathway
Source: Royal Society of Chemistry journal article supplement (doi:10.1039/c6dt01725h), 2016-01-01
Supplement: c6dt01725h1.pdf [file c6dt01725h1.pdf]

**Platinum-Catalysed Intermolecular Addition of Carbonyl Compounds to 1,6-Enynes:  
Investigation of a new reaction pathway.**

*Kévin FOURMY<sup>a,b</sup>, Mohamed EL LOUZ<sup>a,b</sup>, Sonia MALLET-LADEIRA<sup>a,b</sup>, Jean-Claude  
DARAN<sup>a,b</sup>, Odile DECHY-CABARET<sup>a,b\*</sup>, Maryse GOUYGOU<sup>a,b\*</sup>*

<sup>a</sup> CNRS, LCC (Laboratoire de Chimie de Coordination), 205 route de Narbonne, BP 44099,  
F-31077 Toulouse Cedex 4, France; Tel: +33 534 32 35 74;

<sup>b</sup> Université de Toulouse, UPS, INPT, F-31077 Toulouse Cedex 4, France

\* Corresponding authors: [odile.dechycabaret@ensiacet.fr](mailto:odile.dechycabaret@ensiacet.fr), [maryse.gouygou@lcc-toulouse.fr](mailto:maryse.gouygou@lcc-toulouse.fr)

**Table of contents**

- 1. General information**
- 2. Preparation of Pt-complexes and substrates**
- 3. General procedure for Pt(II)-catalysed reaction of 1,6-enynes with aldehydes**
- 4. X-ray structures of 3a and 5a**
- 5. NMR spectra**
- 6. References**

## 1. General information

All commercially available reagents were used as received. Silver salts were stored under argon in Schlenk tubes. Unless otherwise stated, all reactions were run under Argon using Schlenk techniques. THF was dried under N<sub>2</sub> using a solvent purification system (SPS). DCE was distilled under CaH<sub>2</sub>. NMR spectra were recorded at 25 °C on a DPX300 or Fourier 300 Ultrashield spectrometers with TMS as internal reference. The following abbreviations were used throughout: s = singlet, d = doublet, t = triplet, m = multiplet. The assignments of signals of compounds **3** and **5** were confirmed by <sup>1</sup>H, <sup>13</sup>C, COSY, HSQC, DEPT135 and NOESY experiments. Mass spectra analyses were performed on a API-365 spectrometer (ESI) and on a TSQ 7000 Thermoquest instrument (DCI). High resolution mass spectra (HMRS) were recorded using a Waters Xevo G2 QToF instrument. X-ray structures were determined on Gemini and Xcalibur diffractometers.

## 2. Preparation of the Pt-complexes and the substrates

Starting Pt-phospholes complexes were prepared according to literature procedures.<sup>[1]</sup> Starting enynes, **1a-1c**<sup>[2]</sup>, **1d**<sup>[3]</sup>, **1e**<sup>[4],[5]</sup>, **1f-g**<sup>[2]</sup>, **1h**<sup>[3]</sup> and deuterated benzaldehyde **[D]-4b**<sup>[6]</sup> were prepared according to the literature procedures. Synthesis and spectroscopic data of compound **6** have been previously described.<sup>[7]</sup> The deuterated enyne **[D]-1a** was prepared via the following procedure.

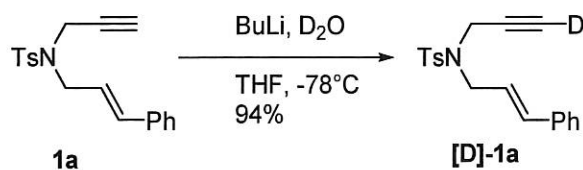

Enyne (300 mg, 0.92 mmol, 1 eq) was dissolved in 10 mL of THF. The mixture was cooled down to -78 °C and n-BuLi (0.633 mL, 1.012 mmol, 1.1 eq) was added dropwise and stirred 20 min at -78 °C. Then the reaction was quenched with few drops of D<sub>2</sub>O and allowed to warm up to room temperature. After 1 h of stirring at room temperature, the mixture was concentrated and the crude was purified by column chromatography using AcOEt/Hexane (1/5).

**[D]-1a.** white solid, m.p.=82 °C, yield: 94%. <sup>1</sup>H NMR (300 MHz, CDCl<sub>3</sub>): δ 7.70 (d, 2H, CH<sub>tosyl</sub>), 7.28-7.17 (m, 7H, CH<sub>Ph</sub> and CH<sub>tosyl</sub>), 6.50 (d, 1H, =CH-Ph), 6.01 (dt, 1H, -CH=CH<sub>2</sub>), 4.06 (s, 2H, -CH<sub>2</sub>-N), 3.91 (d, 2H, N-CH<sub>2</sub>-CH=), 2.37 (s, 3H, CH<sub>3tosyl</sub>). <sup>13</sup>C NMR (75 MHz, CDCl<sub>3</sub>) δ 143.5 (Cq), 136.1 (Cq), 136.0 (Cq), 135.0 (CH), 129.6 (2CH<sub>Ar</sub>), 128.7 (2CH<sub>Ar</sub>), 128.1

(CH), 127.9 (2CH<sub>Ar</sub>), 126.6 (2CH<sub>Ar</sub>), 123.0 (CH), 48.6 (CH<sub>2</sub>), 35.8 (CH<sub>2</sub>), 21.6 (CH<sub>3</sub>). C-D not seen. MS (ESI): *m/z* (%) : 327.1 (100) [M+H].

### 3. General procedure for Pt(II)-catalysed reaction of 1,6 enynes with aldehydes.

A solution of platinum catalyst (0.027 mmol, 0.05 eq) and silver salt (0.054 mmol, 0.1 eq) was stirred in DCE (1.3 mL), in a vial for 5 min at room temperature. Then it was added through a PTFE membrane filter on a solution of enyne (0.54 mmol, 1 eq), and aldehyde (1.62 mmol, 3 eq) in DCE. The reaction was monitored by TLC. Then the crude was concentrated and subjected to silica gel chromatography, eluting with AcOEt/pentane.

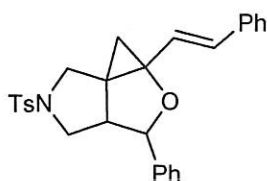

**3a.** white solid, m.p.=169 °C, yield: 58%. <sup>1</sup>H NMR (300 MHz, CDCl<sub>3</sub>): δ 7.53 (d, *J* = 9 Hz, 2H, CH<sub>Tosyl</sub>), 7.23-7.15 (m, 10H, CH<sub>Ph</sub>), 7.04 (d, *J* = 9 Hz, 2H, CH<sub>Tosyl</sub>), 6.55 (d, *J* = 15 Hz, 1H, Ph-CH=), 5.69 (d, *J* = 15 Hz, 1H, CH=CHPh), 4.99 (d, *J* = 6 Hz, 1H, CH-Ph), 3.70 (d, *J* = 9 Hz, 1H, N-CH<sub>2</sub>-Cq), 3.15-3.09 (m, 3H, N-CH<sub>2</sub>-Cq + N-CH<sub>2</sub>-CH + N-CH<sub>2</sub>-CH), 2.49 (t, *J* = 9 Hz, 1H, N-CH<sub>2</sub>-CH), 2.10 (s, 3H, CH<sub>3Tosyl</sub>) 1.77 (d, *J* = 9 Hz, 1H, CH<sub>cyclopropyl</sub>), 1.17 (d, *J* = 9 Hz, 1H, CH<sub>cyclopropyl</sub>). <sup>13</sup>C NMR (75 MHz, CDCl<sub>3</sub>): δ 143.7 (Cq), 137.4 (Cq), 136.5 (Cq), 132.8 (Cq), 129.7 (Ph-CH=), 129.6 (CH<sub>Ar</sub>), 128.6 (CH<sub>Ar</sub>), 128.5 (CH<sub>Ar</sub>), 127.7 (CH<sub>Ar</sub>), 127.6 (CH<sub>Ar</sub>), 127.4 (CH<sub>Ar</sub>), 126.4 (CH<sub>Ar</sub>), 125.2 (CH<sub>Ar</sub>), 124.3 (CH=CH-Ph), 78.6 (CH-Ph), 69.7 (C-CH=), 49.2 (N-CH<sub>2</sub>-CH), 48.9 (N-CH<sub>2</sub>-CH), 48.7 (N-CH<sub>2</sub>-Cq), 30.0 (Cq), 21.6 (CH<sub>3Tosyl</sub>), 15.8 (CH<sub>2cyclopropyl</sub>). HRMS (ESI): *m/z*: calc. for C<sub>28</sub>H<sub>28</sub>NO<sub>3</sub>S [M+H]: 458.1790, found 458.1780.

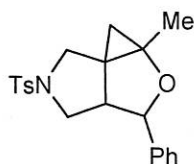

**5a.** white solid, m.p.=86 °C, yield: 67%. <sup>1</sup>H NMR (300 MHz, CDCl<sub>3</sub>): δ 7.59 (d, *J* = 9 Hz, 2H, CH<sub>Tosyl</sub>), 7.29-7.18 (m, 5H, CH<sub>Ph</sub>), 7.13 (d, *J* = 9 Hz, 2H, CH<sub>Tosyl</sub>), 4.73 (d, *J* = 6 Hz, 1H, CH-Ph), 3.54 (d, *J* = 9 Hz, 1H, N-CH<sub>2</sub>-Cq), 2.99-2.95 (m, 2H, N-CH<sub>2</sub>-CH + N-CH<sub>2</sub>-Cq), 2.86 (m, 1H, N-CH<sub>2</sub>-CH), 2.45 (t, *J* = 9 Hz, 1H, N-CH<sub>2</sub>-CH), 2.39 (s, 3H, CH<sub>3Tosyl</sub>), 1.36 (d, *J* = 9 Hz, 1H, CH<sub>cyclopropyl</sub>), 0.97 (s, 3H, CH<sub>3</sub>), 0.54 (d, *J* = 9 Hz, 1H, CH<sub>cyclopropyl</sub>). <sup>13</sup>C NMR (75 MHz, CDCl<sub>3</sub>): δ 143.7 (Cq), 137.6 (Cq), 133.3 (Cq), 129.7 (CH<sub>Ar</sub>), 128.4 (CH<sub>Ar</sub>), 127.7 (CH<sub>Ar</sub>), 127.5

(CH<sub>Ar</sub>), 125.1 (CH<sub>Ar</sub>), 78.2 (CH-Ph), 65.9 (C-CH<sub>3</sub>), 49.1 (N-CH<sub>2</sub>-Cq), 49.0 (N-CH<sub>2</sub>-CH), 48.7 (N-CH<sub>2</sub>-CH), 35.3 (Cq), 21.6 (CH<sub>3</sub>tosyl), 16.2 (CH<sub>3</sub>), 14.3 (CH<sub>2</sub>cyclopropyl). HRMS (ESI): *m/z*: calc. for C<sub>21</sub>H<sub>24</sub>NO<sub>3</sub>S [M+H]: 370.1477, found 370.1472.

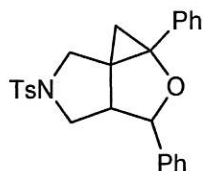

**5b.** white solid, m.p.=140 °C, yield: 30%. <sup>1</sup>H NMR (300 MHz, CDCl<sub>3</sub>): δ 7.36-7.02 (m, 14H, CH<sub>tosyl</sub> and CH<sub>Ph</sub>), 5.03 (d, *J* = 6 Hz, 1H, CH-Ph), 3.60 (d, *J* = 9 Hz, 1H, N-CH<sub>2</sub>-Cq), 3.14 (m, 2H, N-CH<sub>2</sub>-CH + N-CH<sub>2</sub>-CH), 2.18 (d, *J* = 9 Hz, 1H, N-CH<sub>2</sub>-Cq), 2.51 (t, *J* = 12 Hz, 1H, N-CH<sub>2</sub>-CH), 2.41 (s, 3H, CH<sub>3</sub>tosyl) 1.74 (d, *J* =, 1H, CH<sub>cyclopropyl</sub>), 1.40 (d, *J* =, 1H, CH<sub>cyclopropyl</sub>). <sup>13</sup>C NMR (75 MHz, CDCl<sub>3</sub>): δ 143.2 (Cq), 137.7 (Cq), 135.4 (Cq), 133.1 (Cq), 129.7 (CH<sub>Ar</sub>), 128.5 (CH<sub>Ar</sub>), 128.5 (CH<sub>Ar</sub>), 128.0 (CH<sub>Ar</sub>), 127.6 (CH<sub>Ar</sub>), 127.2 (CH<sub>Ar</sub>), 126.5 (CH<sub>Ar</sub>), 125.1 (CH<sub>Ar</sub>), 78.5 (CH-Ph), 71.2 (Cq), 49.3 (N-CH<sub>2</sub>-Cq), 49.1 (N-CH<sub>2</sub>-CH), 47.9 (N-CH<sub>2</sub>-CH), 39.3 (Cq), 21.7 (CH<sub>3</sub>tosyl), 12.9 (CH<sub>2</sub>cyclopropyl). MS (DCI/NH<sub>3</sub>): *m/z* (%): 432.1 (100) [M+H<sup>+</sup>].

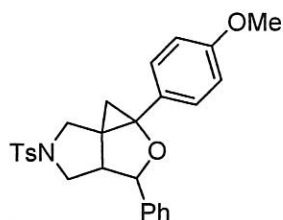

**5c.** white solid, m.p.=103 °C, yield: 28%. <sup>1</sup>H NMR (300 MHz, CDCl<sub>3</sub>) δ 7.38 (d, *J* = 9 Hz, 2H, CH<sub>tosyl</sub>), 7.28-7.19 (m, 5H, CH<sub>Ph</sub>), 7.12 (d, *J* = 9 Hz, 2H, CH<sub>tosyl</sub>), 6.91 (d, *J* = 9 Hz, 2H, CH<sub>PhOMe</sub>), 6.63 (d, *J* = 9 Hz, 2H, CH<sub>PhOMe</sub>), 4.95 (d, *J* = 6 Hz, 1H, CH-Ph), 3.77 (s, 3H, OCH<sub>3</sub>), 3.50 (d, *J* = 9 Hz, 1H, N-CH<sub>2</sub>-Cq), 3.09 (m, 2H, N-CH<sub>2</sub>-CH + N-CH<sub>2</sub>-CH), 2.70 (d, *J* = 9 Hz, 1H, N-CH<sub>2</sub>-Cq), 2.51 (m, 1H, N-CH<sub>2</sub>-CH), 2.40 (s, 3H, CH<sub>3</sub>tosyl), 1.72 (d, *J* = 9 Hz, 1H, CH<sub>cyclopropyl</sub>), 1.34 (d, *J* = 9 Hz, 1H, CH<sub>cyclopropyl</sub>). <sup>13</sup>C NMR (75 MHz, CDCl<sub>3</sub>) δ 159.1 (Cq), 143.3 (Cq), 137.7 (Cq), 133.4 (Cq), 129.6 (CH<sub>Ar</sub>), 128.5 (CH<sub>Ar</sub>), 128.5 (CH<sub>Ar</sub>), 127.5 (CH<sub>Ar</sub>), 127.4 (CH<sub>Ar</sub>), 127.2 (CH<sub>Ar</sub>), 125.1 (Cq), 114.0 (CH<sub>Ar</sub>), 78.4 (CH-Ph), 71.2 (Cq), 55.3 (OCH<sub>3</sub>), 53.6 (N-CH<sub>2</sub>-Cq), 49.2 (N-CH<sub>2</sub>-CH), 48.2 (N-CH<sub>2</sub>-CH), 38.5 (Cq), 21.6 (CH<sub>3</sub>tosyl), 13.1 (CH<sub>2</sub>cyclopropyl). HRMS (ESI): *m/z*: calc. for C<sub>27</sub>H<sub>28</sub>NO<sub>4</sub>S [M+H]: 462.1739, found 462.1747.

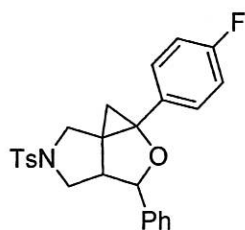

**5d.** white solid, m.p.=143 °C, yield: 36%.  $^1\text{H}$  NMR (300 MHz,  $\text{CDCl}_3$ ):  $\delta$  7.40-7.28 (m, 7H,  $\text{CH}_{\text{tosyl}}$  and  $\text{CH}_{\text{Ph}}$ ), 7.17 (m, 2H,  $\text{CH}_{\text{tosyl}}$ ), 7.0 (m, 2H,  $\text{CH}_{\text{Ph-F}}$ ), 6.86 (m, 2H,  $\text{CH}_{\text{Ph-F}}$ ), 5.06 (d,  $J = 6$  Hz, 1H,  $\text{CH-Ph}$ ), 3.62 (d,  $J = 9$  Hz, 1H,  $\text{N-CH}_2\text{-Cq}$ ), 3.19 (m, 2H,  $\text{N-CH}_2\text{-CH} + \text{N-CH}_2\text{-CH}$ ), 2.73 (d,  $J = 9$  Hz, 1H,  $\text{N-CH}_2\text{-Cq}$ ), 2.52 (t,  $J = 12$  Hz, 1H,  $\text{N-CH}_2\text{-CH}$ ), 2.47 (s, 3H,  $\text{CH}_3_{\text{tosyl}}$ ) 1.84 (d,  $J = 9$  Hz, 1H,  $\text{CH}_{\text{cyclopropyl}}$ ), 1.47 (d,  $J = 9$  Hz, 1H,  $\text{CH}_{\text{cyclopropyl}}$ ).  $^{13}\text{C}$  NMR (75 MHz,  $\text{CDCl}_3$ ):  $\delta$  162.07 (d,  $J_{\text{CF}} = 247$  Hz,  $\text{C}_{\text{qF}}$ ), 143.4 ( $\text{C}_{\text{q}}$ ), 137.5 ( $\text{C}_{\text{q}}$ ), 133.2 ( $\text{C}_{\text{q}}$ ), 131.3 (d,  $J_{\text{CF}} = 3$  Hz,  $\text{C}_{\text{q}}$ ), 129.6 ( $\text{CH}_{\text{Ar}}$ ), 128.6 ( $\text{CH}_{\text{Ar}}$ ), 128.1 ( $\text{CH}_{\text{Ar}}$ ,  $J_{\text{C-F}} = 8$  Hz), 127.7 ( $\text{CH}_{\text{Ar}}$ ), 127.3 ( $\text{CH}_{\text{Ar}}$ ), 125.0 ( $\text{CH}_{\text{Ar}}$ ), 115.6 (d,  $^2J_{\text{C-F}} = 22$  Hz,  $\text{CH}_{\text{Ar}}$ ), 78.6 ( $\text{CH-Ph}$ ), 70.7 ( $\text{C}_{\text{q}}$ ), 49.1 ( $\text{N-CH}_2\text{-Cq}$ ), 49.1 ( $\text{N-CH}_2\text{-CH}$ ), 47.8 ( $\text{N-CH}_2\text{-CH}$ ), 39.2 ( $\text{C}_{\text{q}}$ ), 21.6 ( $\text{CH}_3_{\text{tosyl}}$ ), 13.4 ( $\text{CH}_2_{\text{cyclopropyl}}$ ). HRMS (ESI):  $m/z$ : calc. for  $\text{C}_{26}\text{H}_{25}\text{NO}_3\text{FS}$  [ $\text{M}+\text{H}$ ]: 450.1539, found 450.1531.

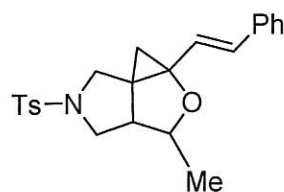

**3b.** white solid, m.p.=81 °C, yield: 57%.  $^1\text{H}$  NMR (300 MHz,  $\text{CDCl}_3$ ):  $\delta$  7.53 (d, 2H,  $\text{CH}_{\text{tosyl}}$ ), 7.25-7.11 (m, 5H,  $\text{CH}_{\text{Ph}}$ ), 6.94 (d, 2H,  $\text{CH}_{\text{tosyl}}$ ), 6.28 (d,  $J = 15$  Hz, 1H,  $\text{Ph-CH=}$ ), 5.55 (d,  $J = 15$  Hz, 1H,  $\text{CH=CH-Ph}$ ), 3.89 (m, 1H,  $\text{CH-CH}_3$ ), 3.56 (d,  $J = 12$  Hz, 1H,  $\text{N-CH}_2\text{-Cq}$ ), 3.43 (m, 1H,  $\text{N-CH}_2\text{-CH}$ ), 3.02 (d,  $J = 12$  Hz, 1H,  $\text{N-CH}_2\text{-Cq}$ ), 2.65 (m, 2H,  $\text{N-CH}_2\text{-CH} + \text{N-CH}_2\text{-CH}$ ), 2.04 (s, 3H,  $\text{CH}_3_{\text{tosyl}}$ ) 1.52 (d,  $J = 9$  Hz, 1H,  $\text{CH}_{\text{cyclopropyl}}$ ), 1.16 (d,  $J = 6$  Hz, 3H,  $\text{CH}_3\text{-CH}$ ) 1.02 (d,  $J = 9$  Hz, 1H,  $\text{CH}_{\text{cyclopropyl}}$ ).  $^{13}\text{C}$  NMR (75 MHz,  $\text{CDCl}_3$ ):  $\delta$  143.6 ( $\text{C}_{\text{q}}$ ), 136.6 ( $\text{C}_{\text{q}}$ ), 132.8 ( $\text{C}_{\text{q}}$ ), 129.6 ( $\text{Ph-CH=}$ ), 128.5 ( $\text{CH}_{\text{Ar}}$ ), 127.5 ( $\text{CH}_{\text{Ar}}$ ), 126.3 ( $\text{CH}_{\text{Ar}}$ ), 124.7 ( $\text{CH=CH-Ph}$ ), 73.7 ( $\text{CH-CH}_3$ ), 69.5 ( $\text{C}_{\text{q}}$ ), 48.5 ( $\text{N-CH}_2\text{-Cq}$ ), 48.2 ( $\text{N-CH}_2\text{-CH}$ ), 47.9 ( $\text{N-CH}_2\text{-CH}$ ), 39.8 ( $\text{C}_{\text{q}}$ ), 21.3 ( $\text{CH}_3_{\text{tosyl}}$ ), 15.6 ( $\text{CH}_3$ ), 15.6 ( $\text{CH}_2_{\text{cyclopropyl}}$ ). HRMS (ESI):  $m/z$ : calc. for  $\text{C}_{23}\text{H}_{26}\text{NO}_3\text{S}$  [ $\text{M}+\text{H}$ ]: 396.1633, found 396.1628.

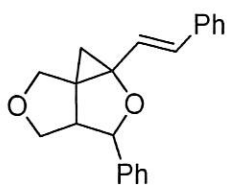

**3g.** yellow oil, yield: 15%.  $^1\text{H}$  NMR (300 MHz,  $\text{CDCl}_3$ ):  $\delta$  7.48-7.18 (m, 10H,  $\text{CH}_{\text{Ph}}$ ), 6.79 (d,  $J = 15$  Hz, 1H,  $\text{Ph-CH=}$ ), 6.11 (d,  $J = 15$  Hz, 1H,  $\text{CH=CH-Ph}$ ), 5.07 (d,  $J = 6$  Hz, 1H,  $\text{CH-Ph}$ ), 3.96 (d,  $J = 9$  Hz, 1H,  $\text{O-CH}_2\text{-Cq}$ ), 3.73 (d,  $J = 9$  Hz, 1H,  $\text{O-CH}_2\text{-Cq}$ ), 3.44 (m, 1H,  $\text{O-CH}_2\text{-CH}$ ), 3.13 (m, 2H,  $\text{O-CH}_2\text{-CH} + \text{CH-Ph}$ ), 1.79 (d,  $J = 9$  Hz, 1H,  $\text{CH}_{\text{cyclopropyl}}$ ), 1.28 (d,  $J = 9$  Hz, 1H,  $\text{CH}_{\text{cyclopropyl}}$ ).  $^{13}\text{C}$  NMR (75 MHz,  $\text{CDCl}_3$ ):  $\delta$  137.3 (Cq), 135.9 (Cq), 128.6 ( $\text{Ph-CH=}$ ), 127.6 ( $\text{CH}_{\text{Ar}}$ ), 127.3 ( $\text{CH}_{\text{Ar}}$ ), 126.38 ( $\text{CH}_{\text{Ar}}$ ), 126.36 ( $\text{CH}_{\text{Ar}}$ ), 125.3 ( $\text{CH}_{\text{Ar}}$ ), 124.8 ( $\text{CH=CH-Ph}$ ), 124.4 ( $\text{CH}_{\text{Ar}}$ ), 79.2 ( $\text{CH-Ph}$ ), 69.1 (C-O), 67.9 ( $\text{O-CH}_2$ ), 67.4 ( $\text{O-CH}_2$ ), 50.0 ( $\text{O-CH}_2\text{-CH}$ ), 41.0 (C-Cq), 15.7 ( $\text{CH}_2_{\text{cyclopropyl}}$ ). HRMS (ESI):  $m/z$ : calc. for  $\text{C}_{21}\text{H}_{21}\text{NO}_2$  [ $\text{M}+\text{H}$ ] 305.1542, found 305.1537.

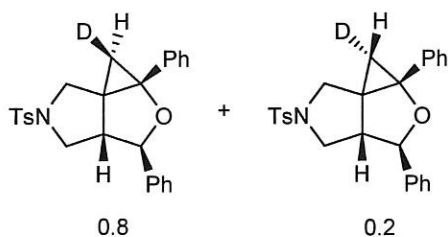

**[D]-5b and [D]-5b'.** white solid, m.p.=145 °C.  $^1\text{H}$  NMR (300 MHz,  $\text{CDCl}_3$ ):  $\delta$  7.36-7.02 (m, 14H,  $\text{CH}_{\text{tosyl}}$  and  $\text{CH}_{\text{Ph}}$ ), 5.03 (d,  $J = 6$  Hz, 1H,  $\text{CH-Ph}$ ), 3.60 (d,  $J = 9$  Hz, 1H,  $\text{N-CH}_2\text{-Cq}$ ), 3.14 (m, 2H,  $\text{N-CH}_2\text{-CH} + \text{N-CH}_2\text{-CH}$ ), 2.18 (d,  $J = 9$  Hz, 1H,  $\text{N-CH}_2\text{-Cq}$ ), 2.51 (t,  $J = 12$  Hz, 1H,  $\text{N-CH}_2\text{-CH}$ ), 2.41 (s, 3H,  $\text{CH}_3_{\text{tosyl}}$ ) 1.73 (s, 0.8 H,  $\text{CH}_{\text{cyclopropyl}}$ ), 1.40 (s, 0.2 H,  $\text{CH}_{\text{cyclopropyl}}$ ).  $^{13}\text{C}$  NMR (75 MHz,  $\text{CDCl}_3$ ):  $\delta$  142.0 (Cq), 136.6 (Cq), 134.3 (Cq), 132.1 (Cq), 128.5 ( $\text{CH}_{\text{Ar}}$ ), 127.5 ( $\text{CH}_{\text{Ar}}$ ), 127.4 ( $\text{CH}_{\text{Ar}}$ ), 126.50 ( $\text{CH}_{\text{Ar}}$ ), 126.2 ( $\text{CH}_{\text{Ar}}$ ), 126.1 ( $\text{CH}_{\text{Ar}}$ ), 125.3 ( $\text{CH}_{\text{Ar}}$ ), 124.0 ( $\text{CH}_{\text{Ar}}$ ), 76.5 ( $\text{CH-Ph}$ ), 70.1 (Cq), 48.2 ( $\text{N-CH}_2\text{-Cq}$ ), 48.0 ( $\text{N-CH}_2\text{-CH}$ ), 48.9 ( $\text{N-CH}_2\text{-CH}$ ), 38.2 (Cq), 20.5 ( $\text{CH}_3_{\text{tosyl}}$ ), 12.2 (t,  $J_{\text{C-D}}=23.5$  Hz,  $\text{CHD}$ ). MS (DCI/ $\text{NH}_3$ ):  $m/z$  (%) : 432.1 (100) [ $\text{M}+\text{H}^+$ ].

#### 4. X-ray structure of **3a** and **5a**.

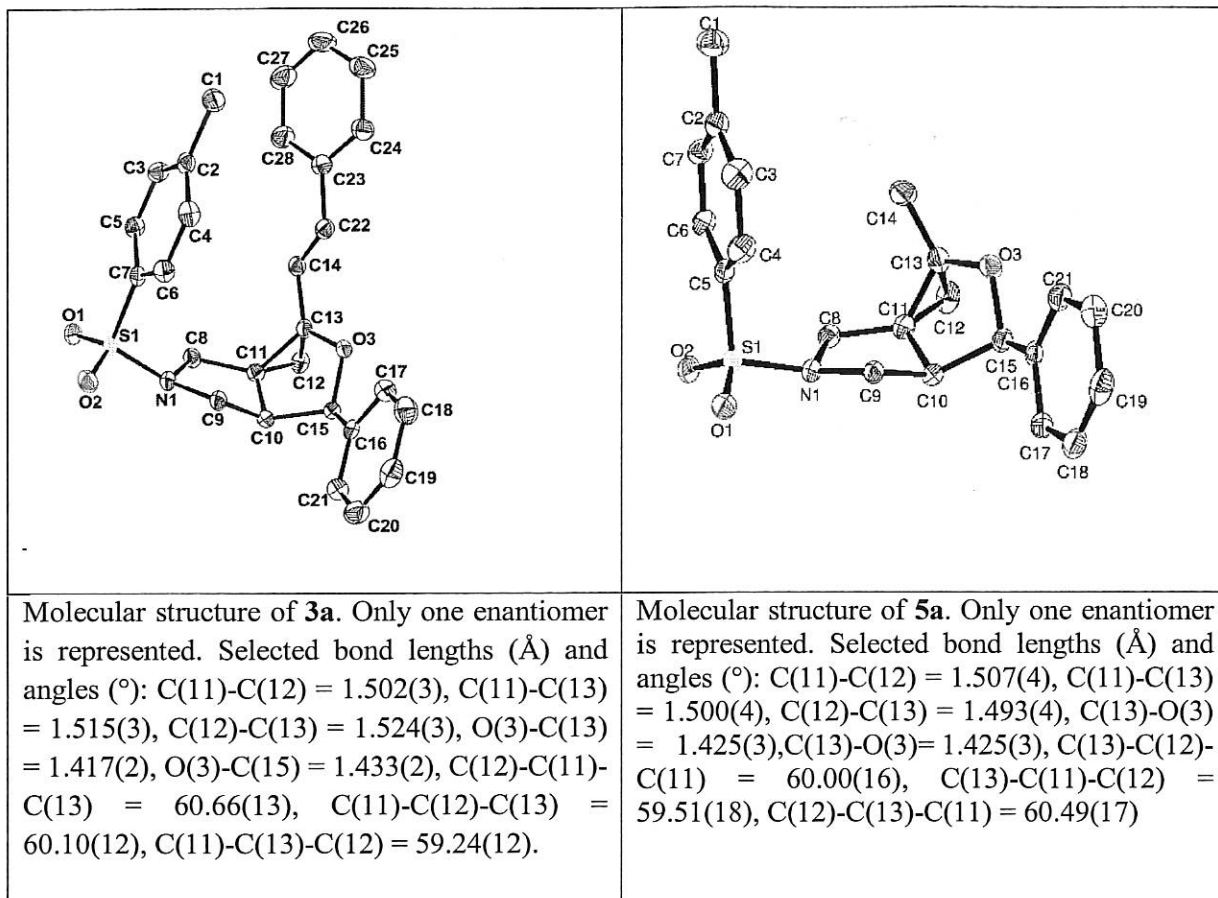

Crystallographic data (excluding structure factors) have been deposited at the Cambridge Crystallographic Data Centre with deposition numbers CCDC 1412293 (**3a**) and CCDC 1411933 (**5a**). Copies of the data can be obtained free of charge on application to the Director, CCDC, 12 Union Road, Cambridge CB2 1EZ, UK (e-mail: [deposit@ccdc.cam.ac.uk](mailto:deposit@ccdc.cam.ac.uk)).

## 5. NMR spectra



[D]-1a

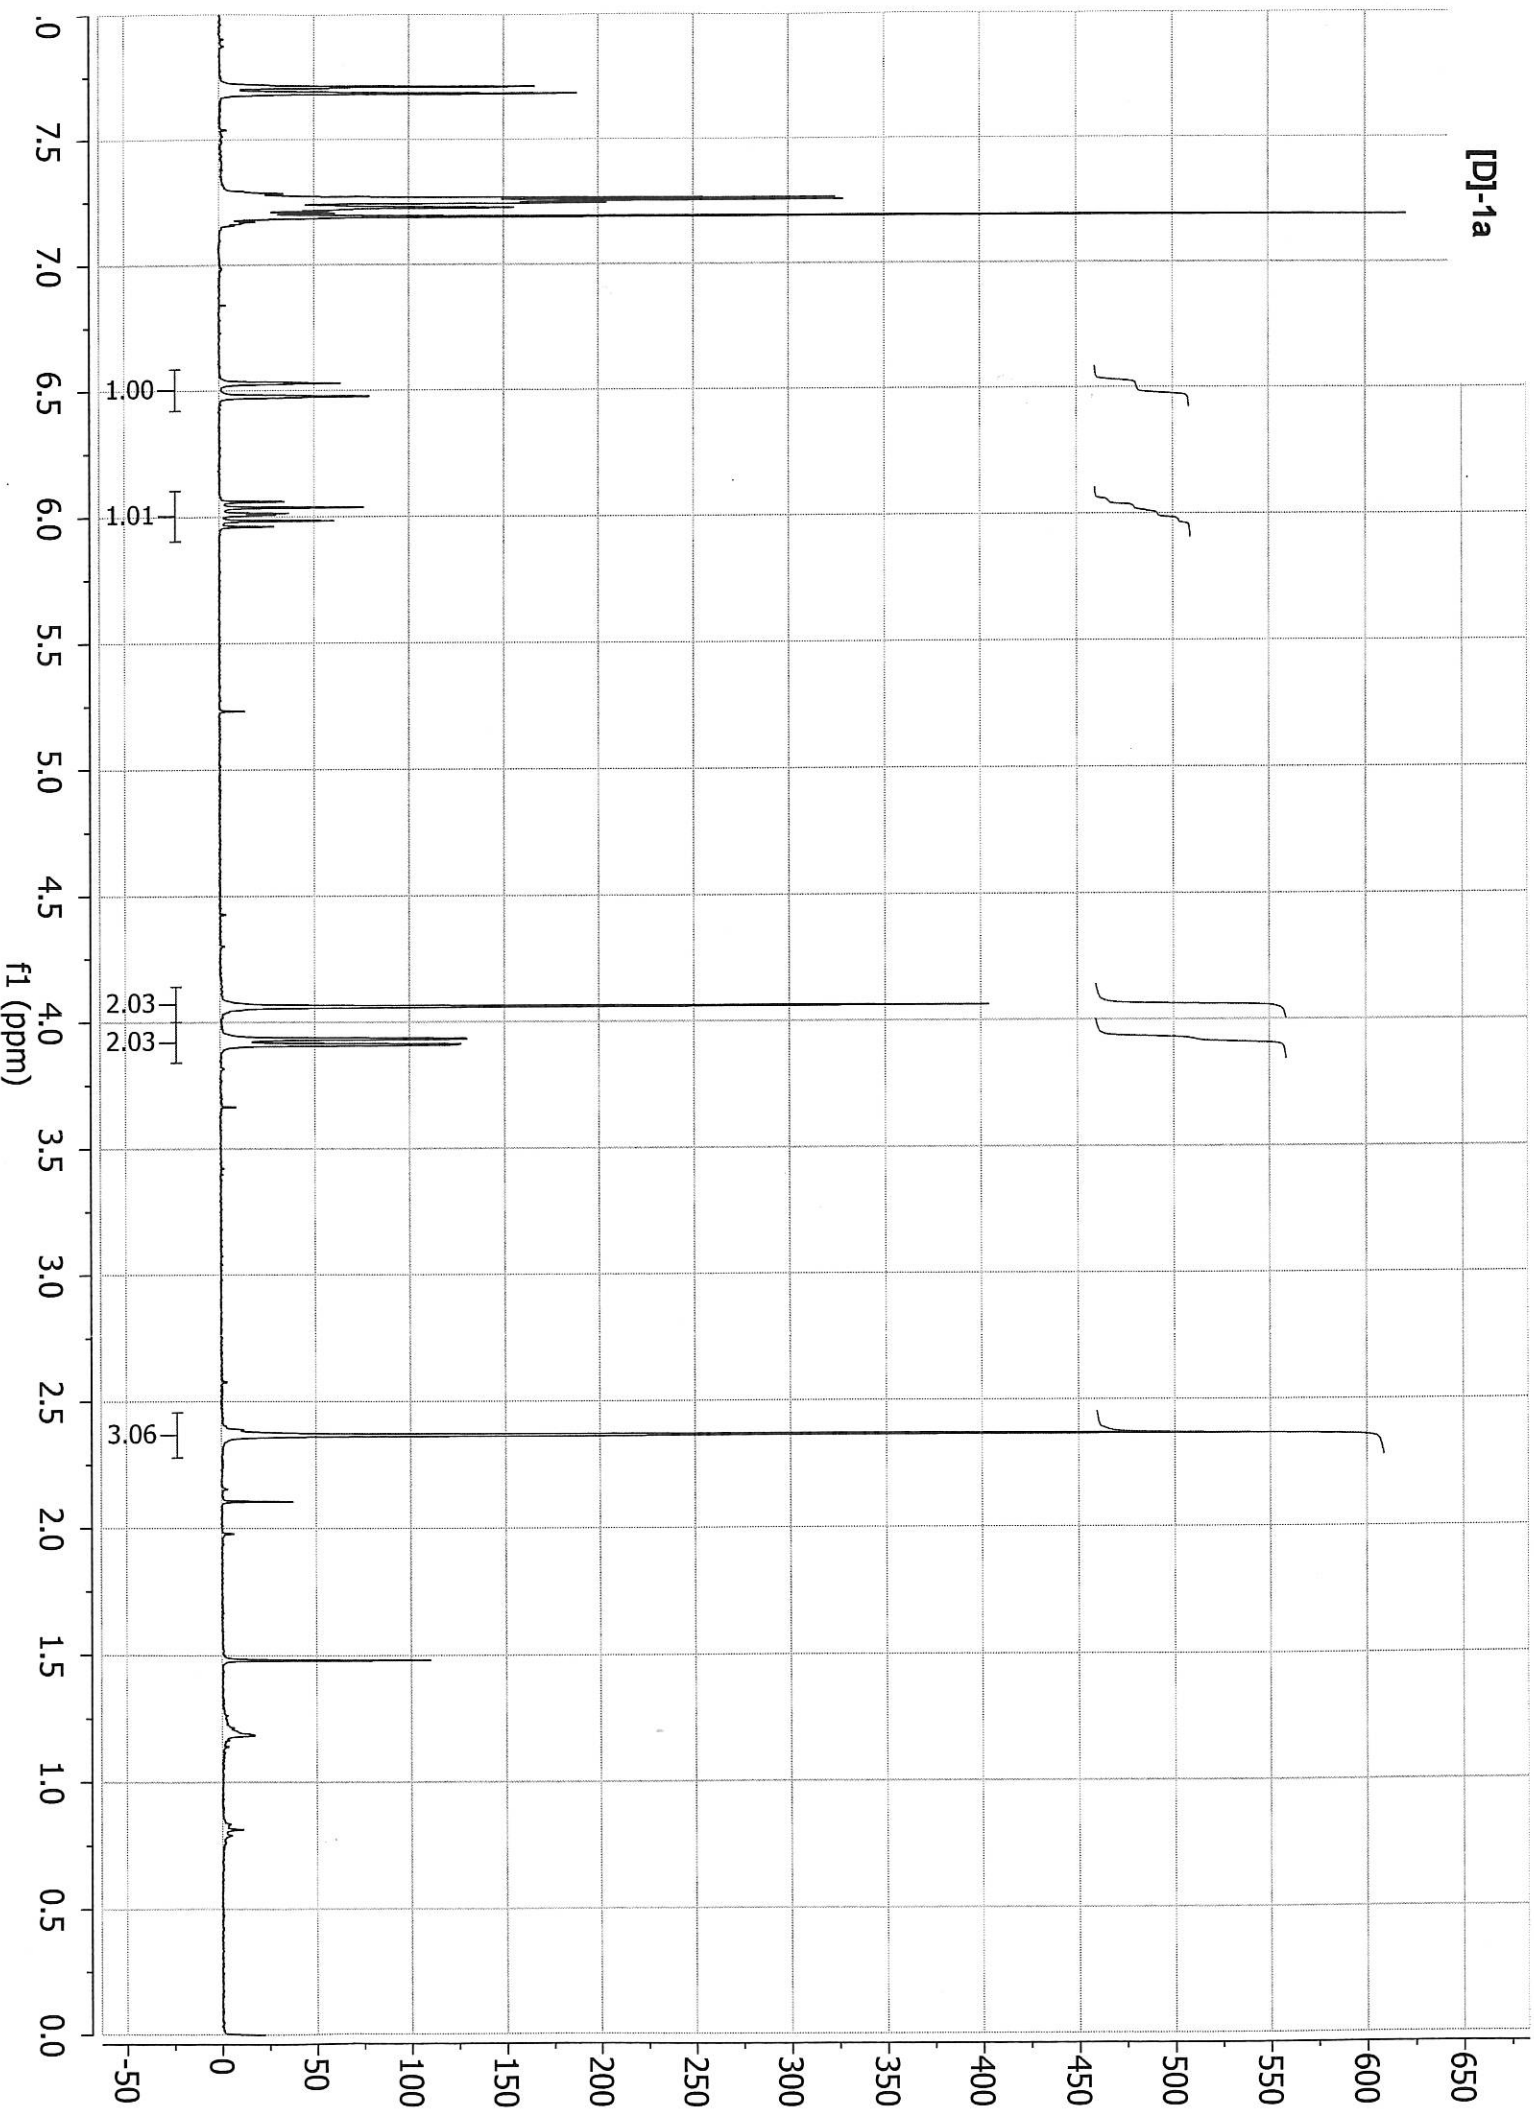

[PJ-1a

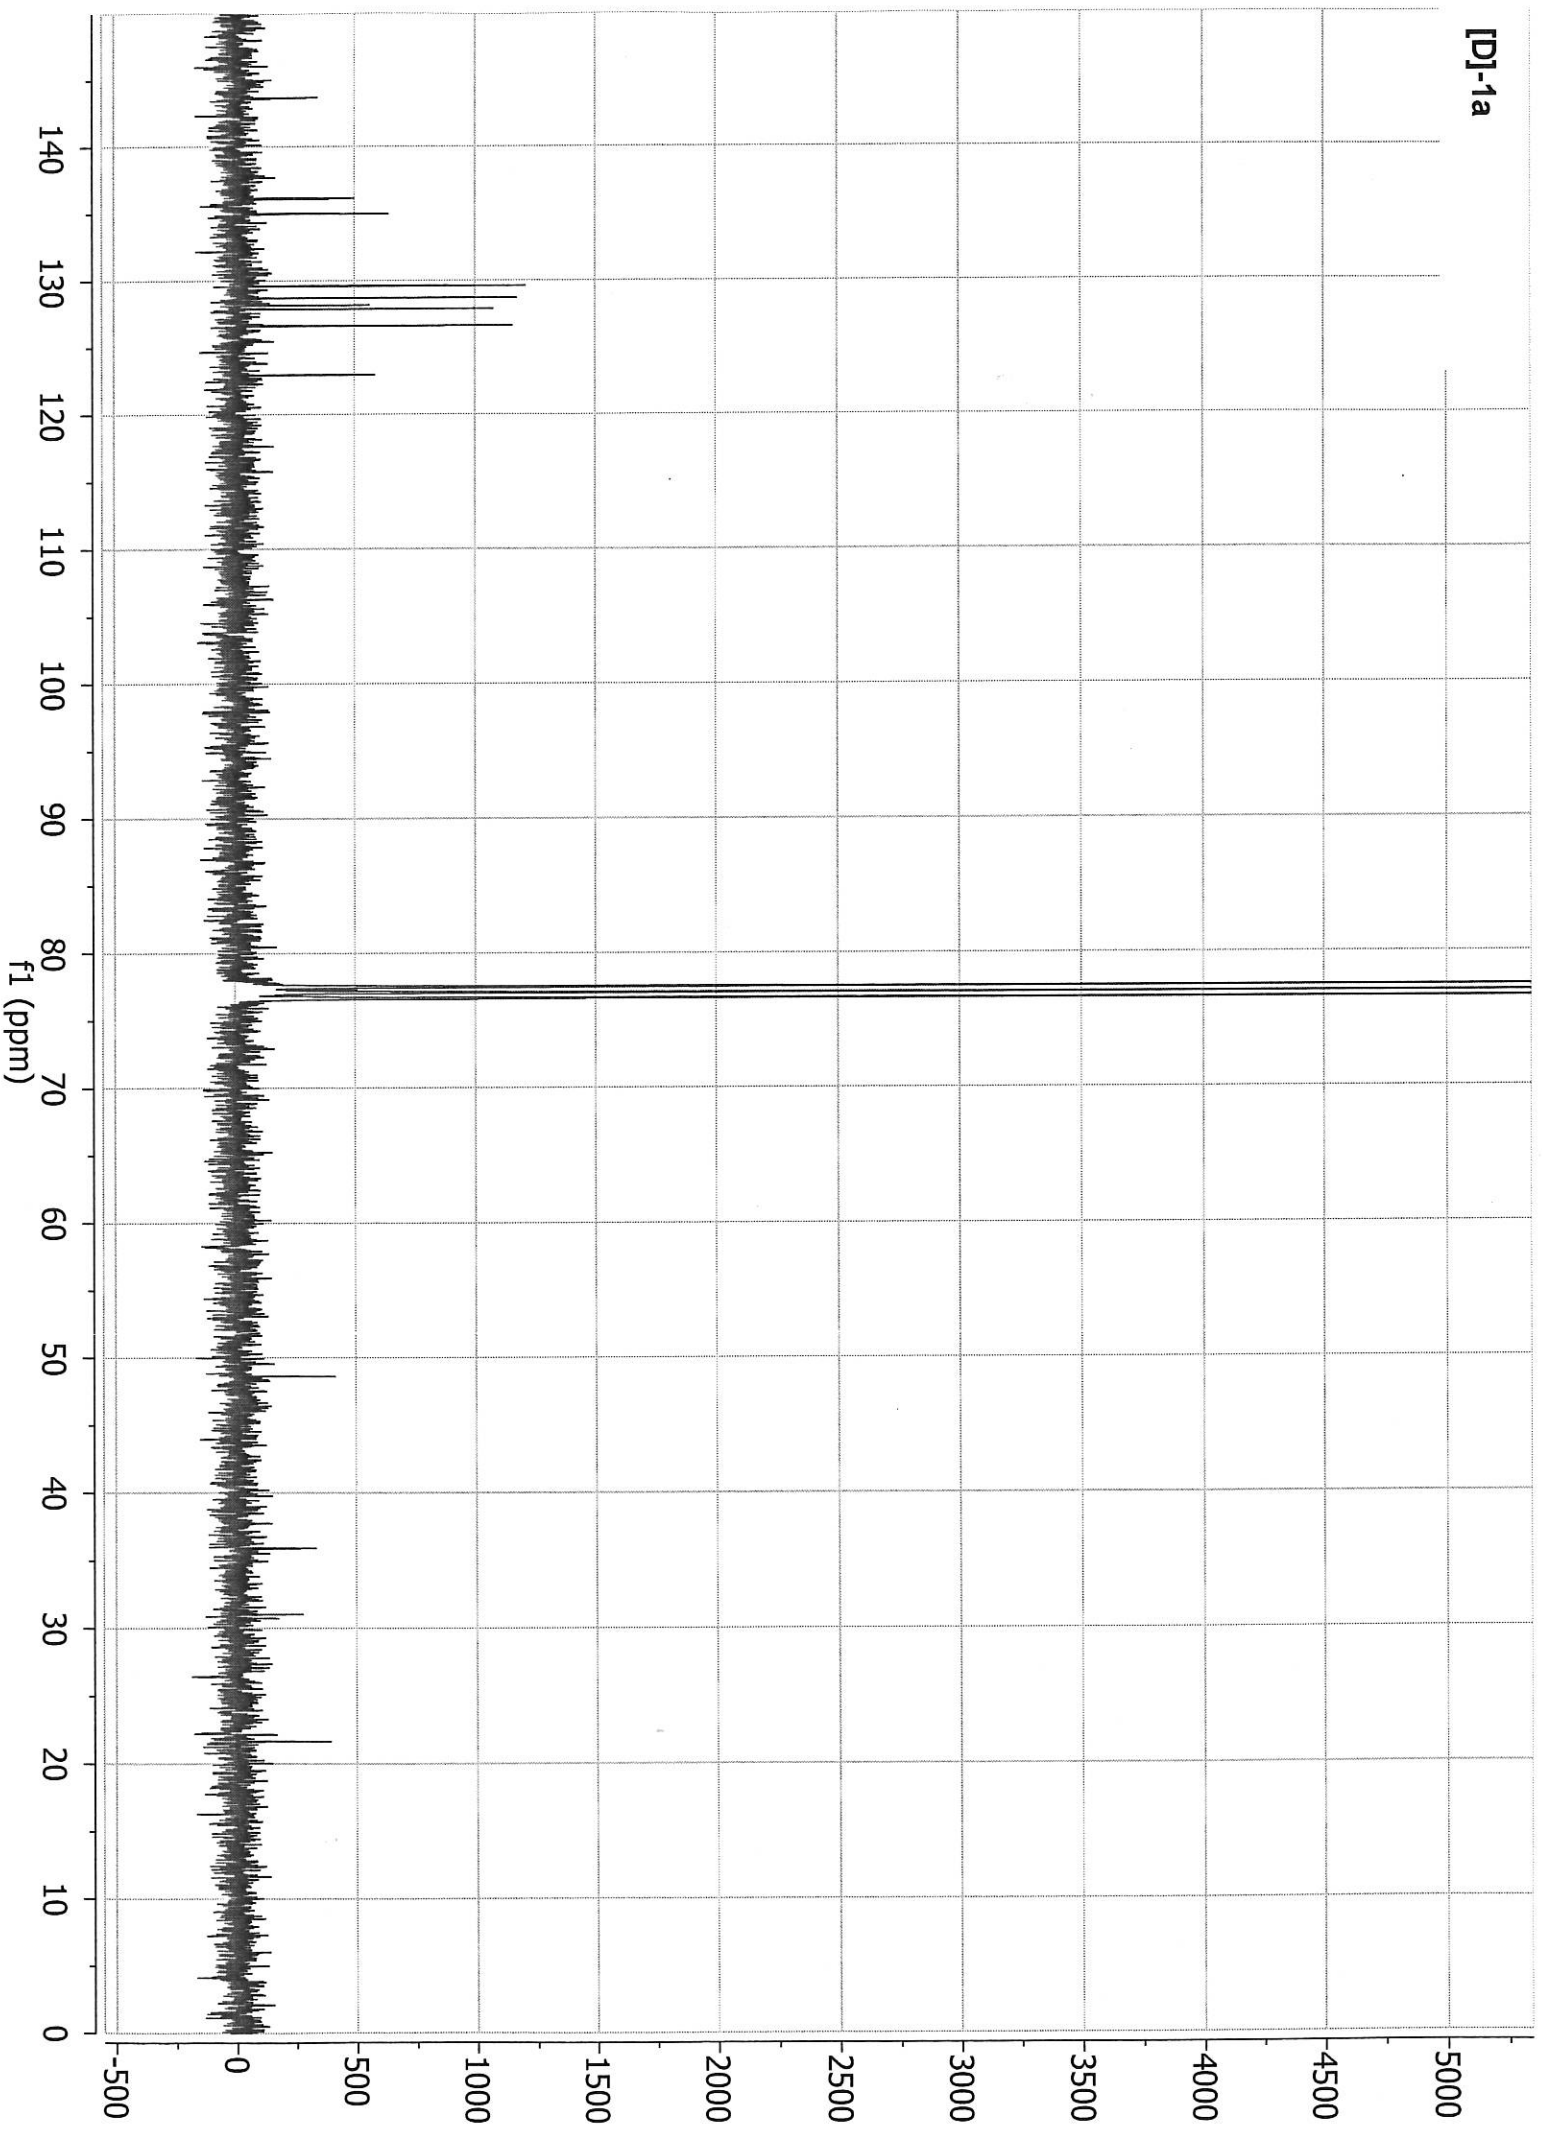

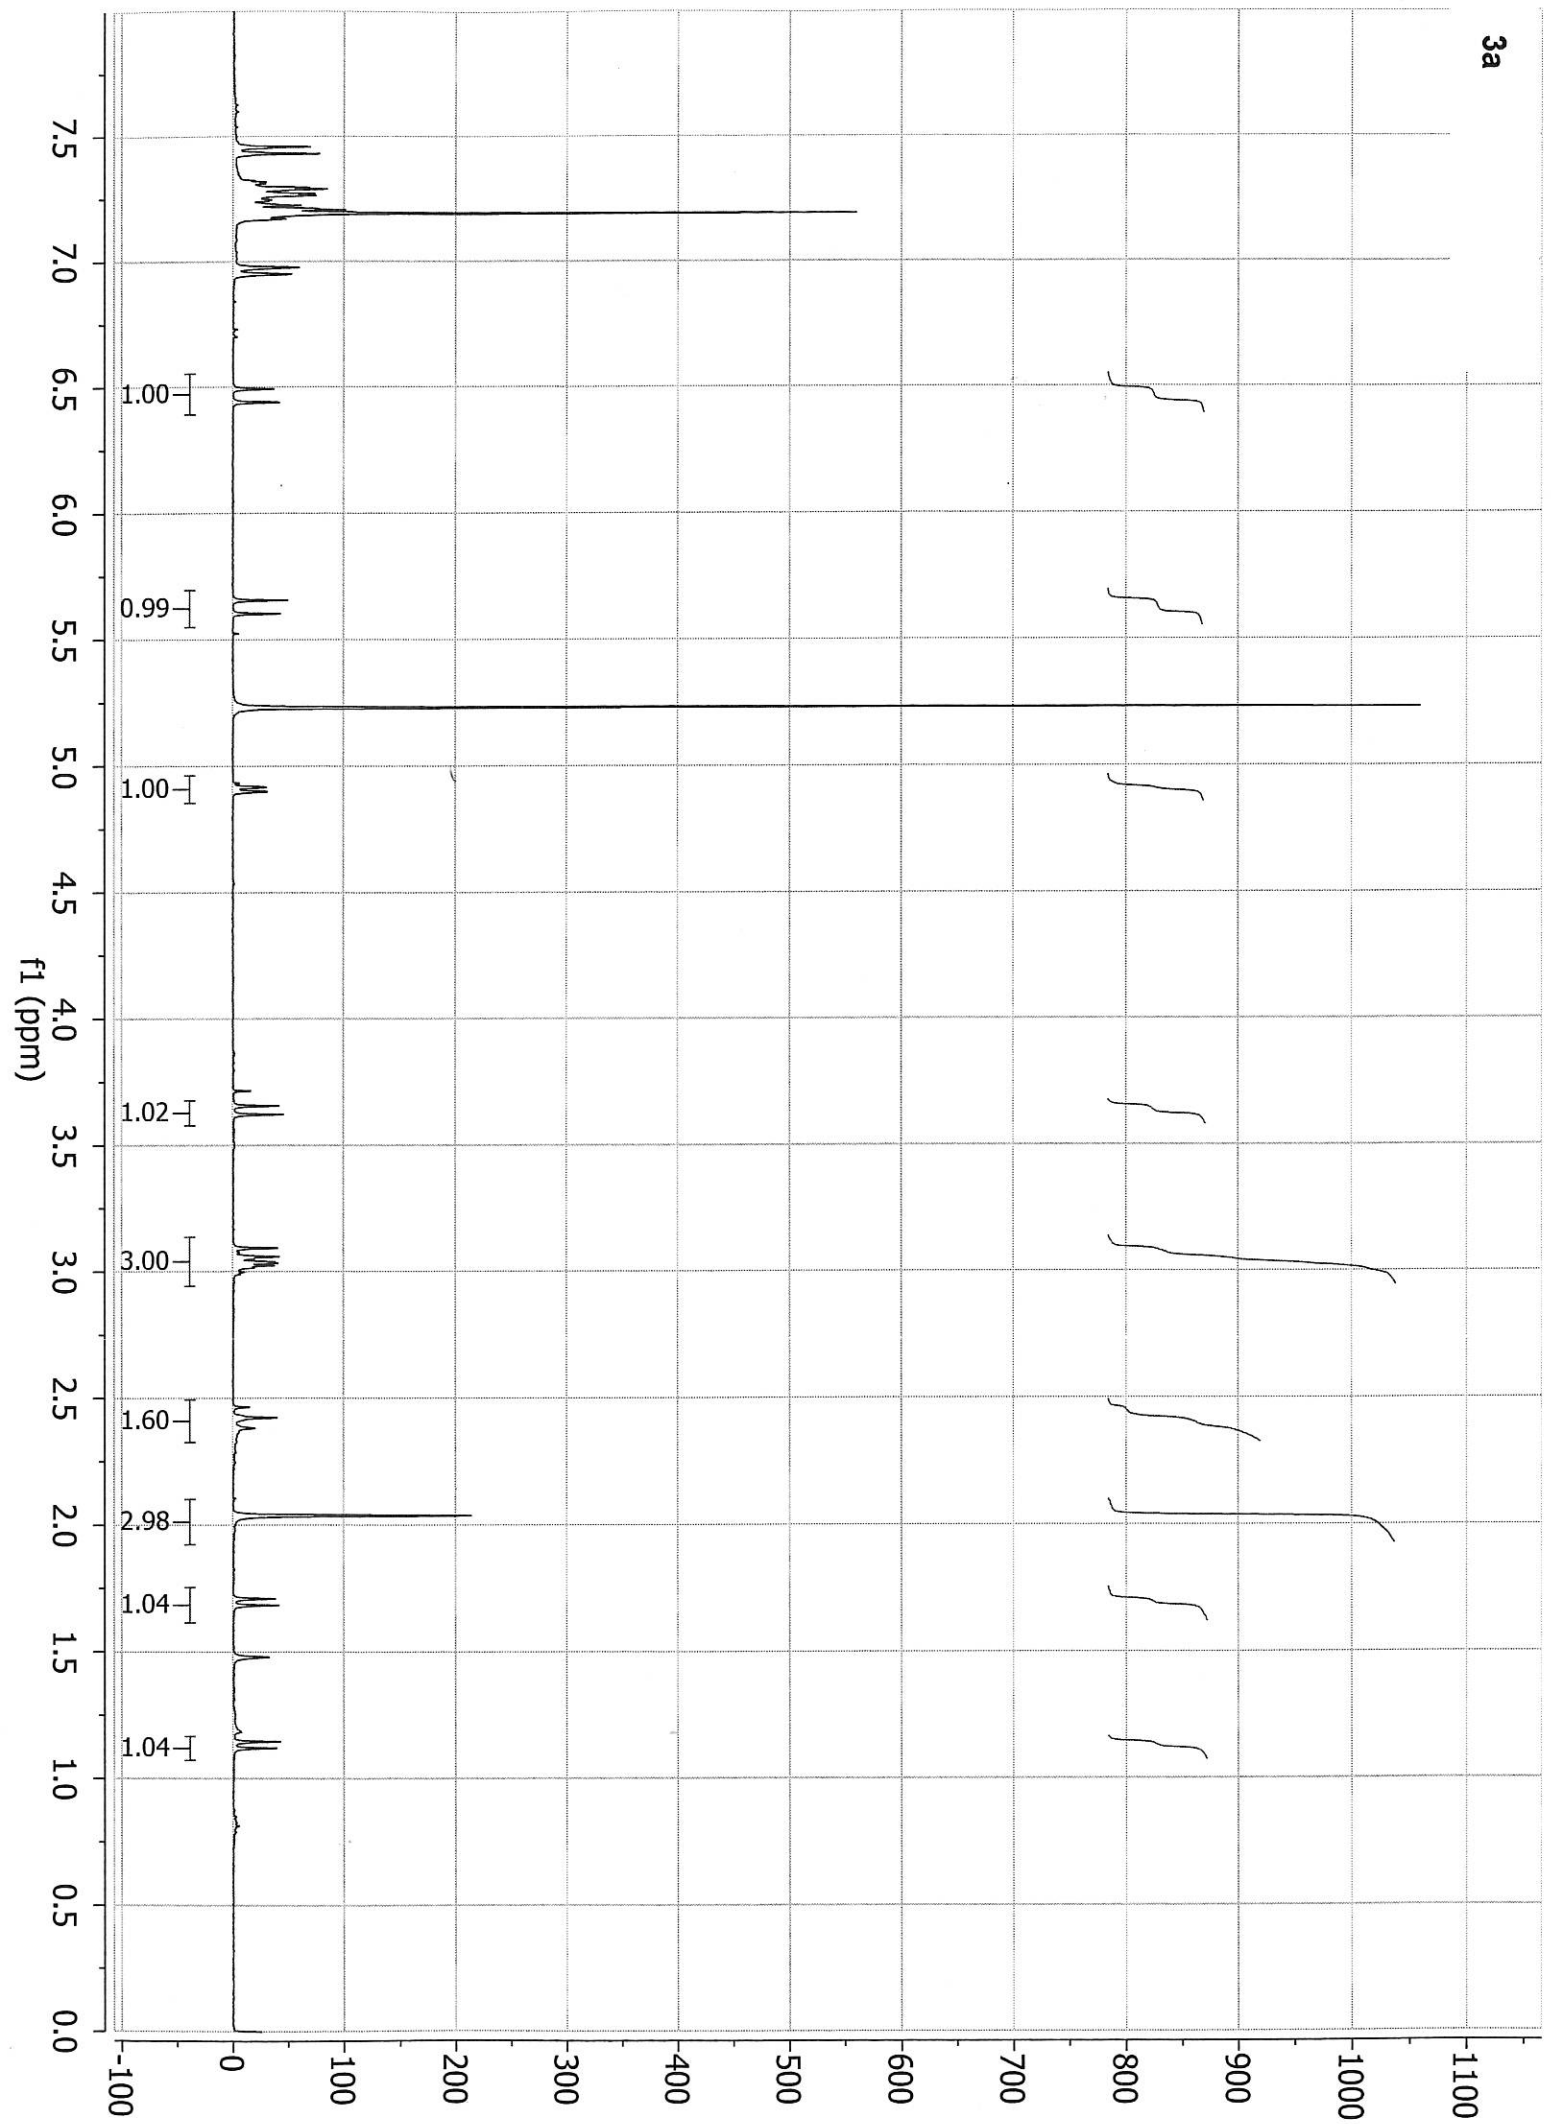

3a

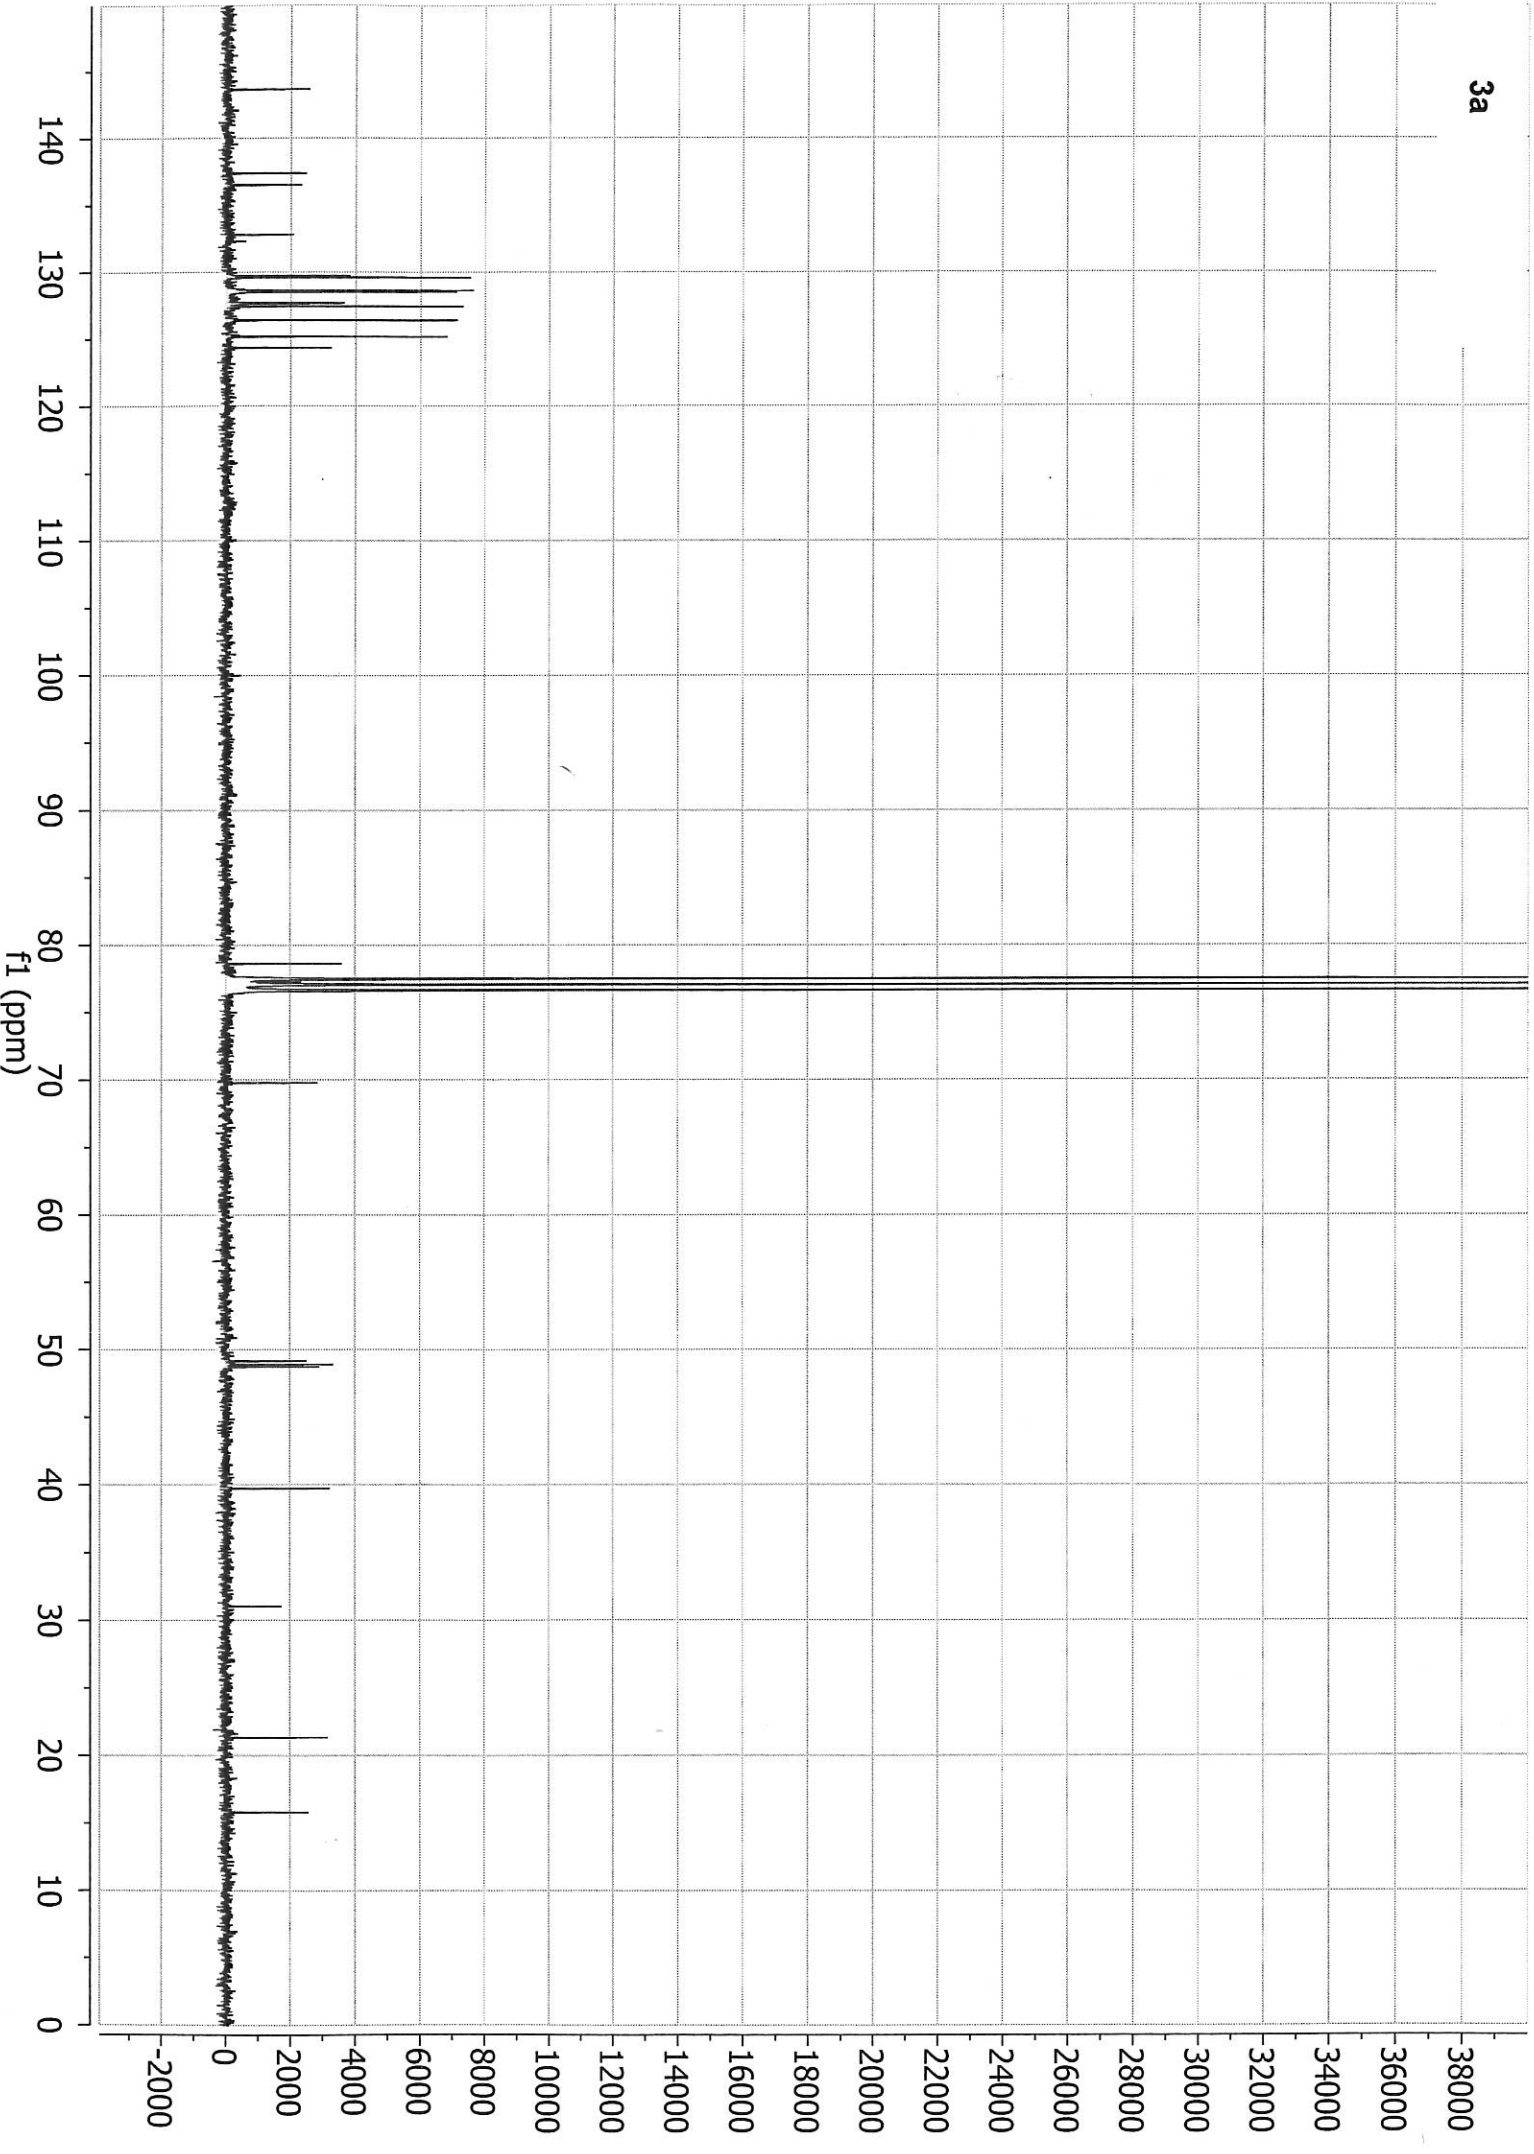

5a

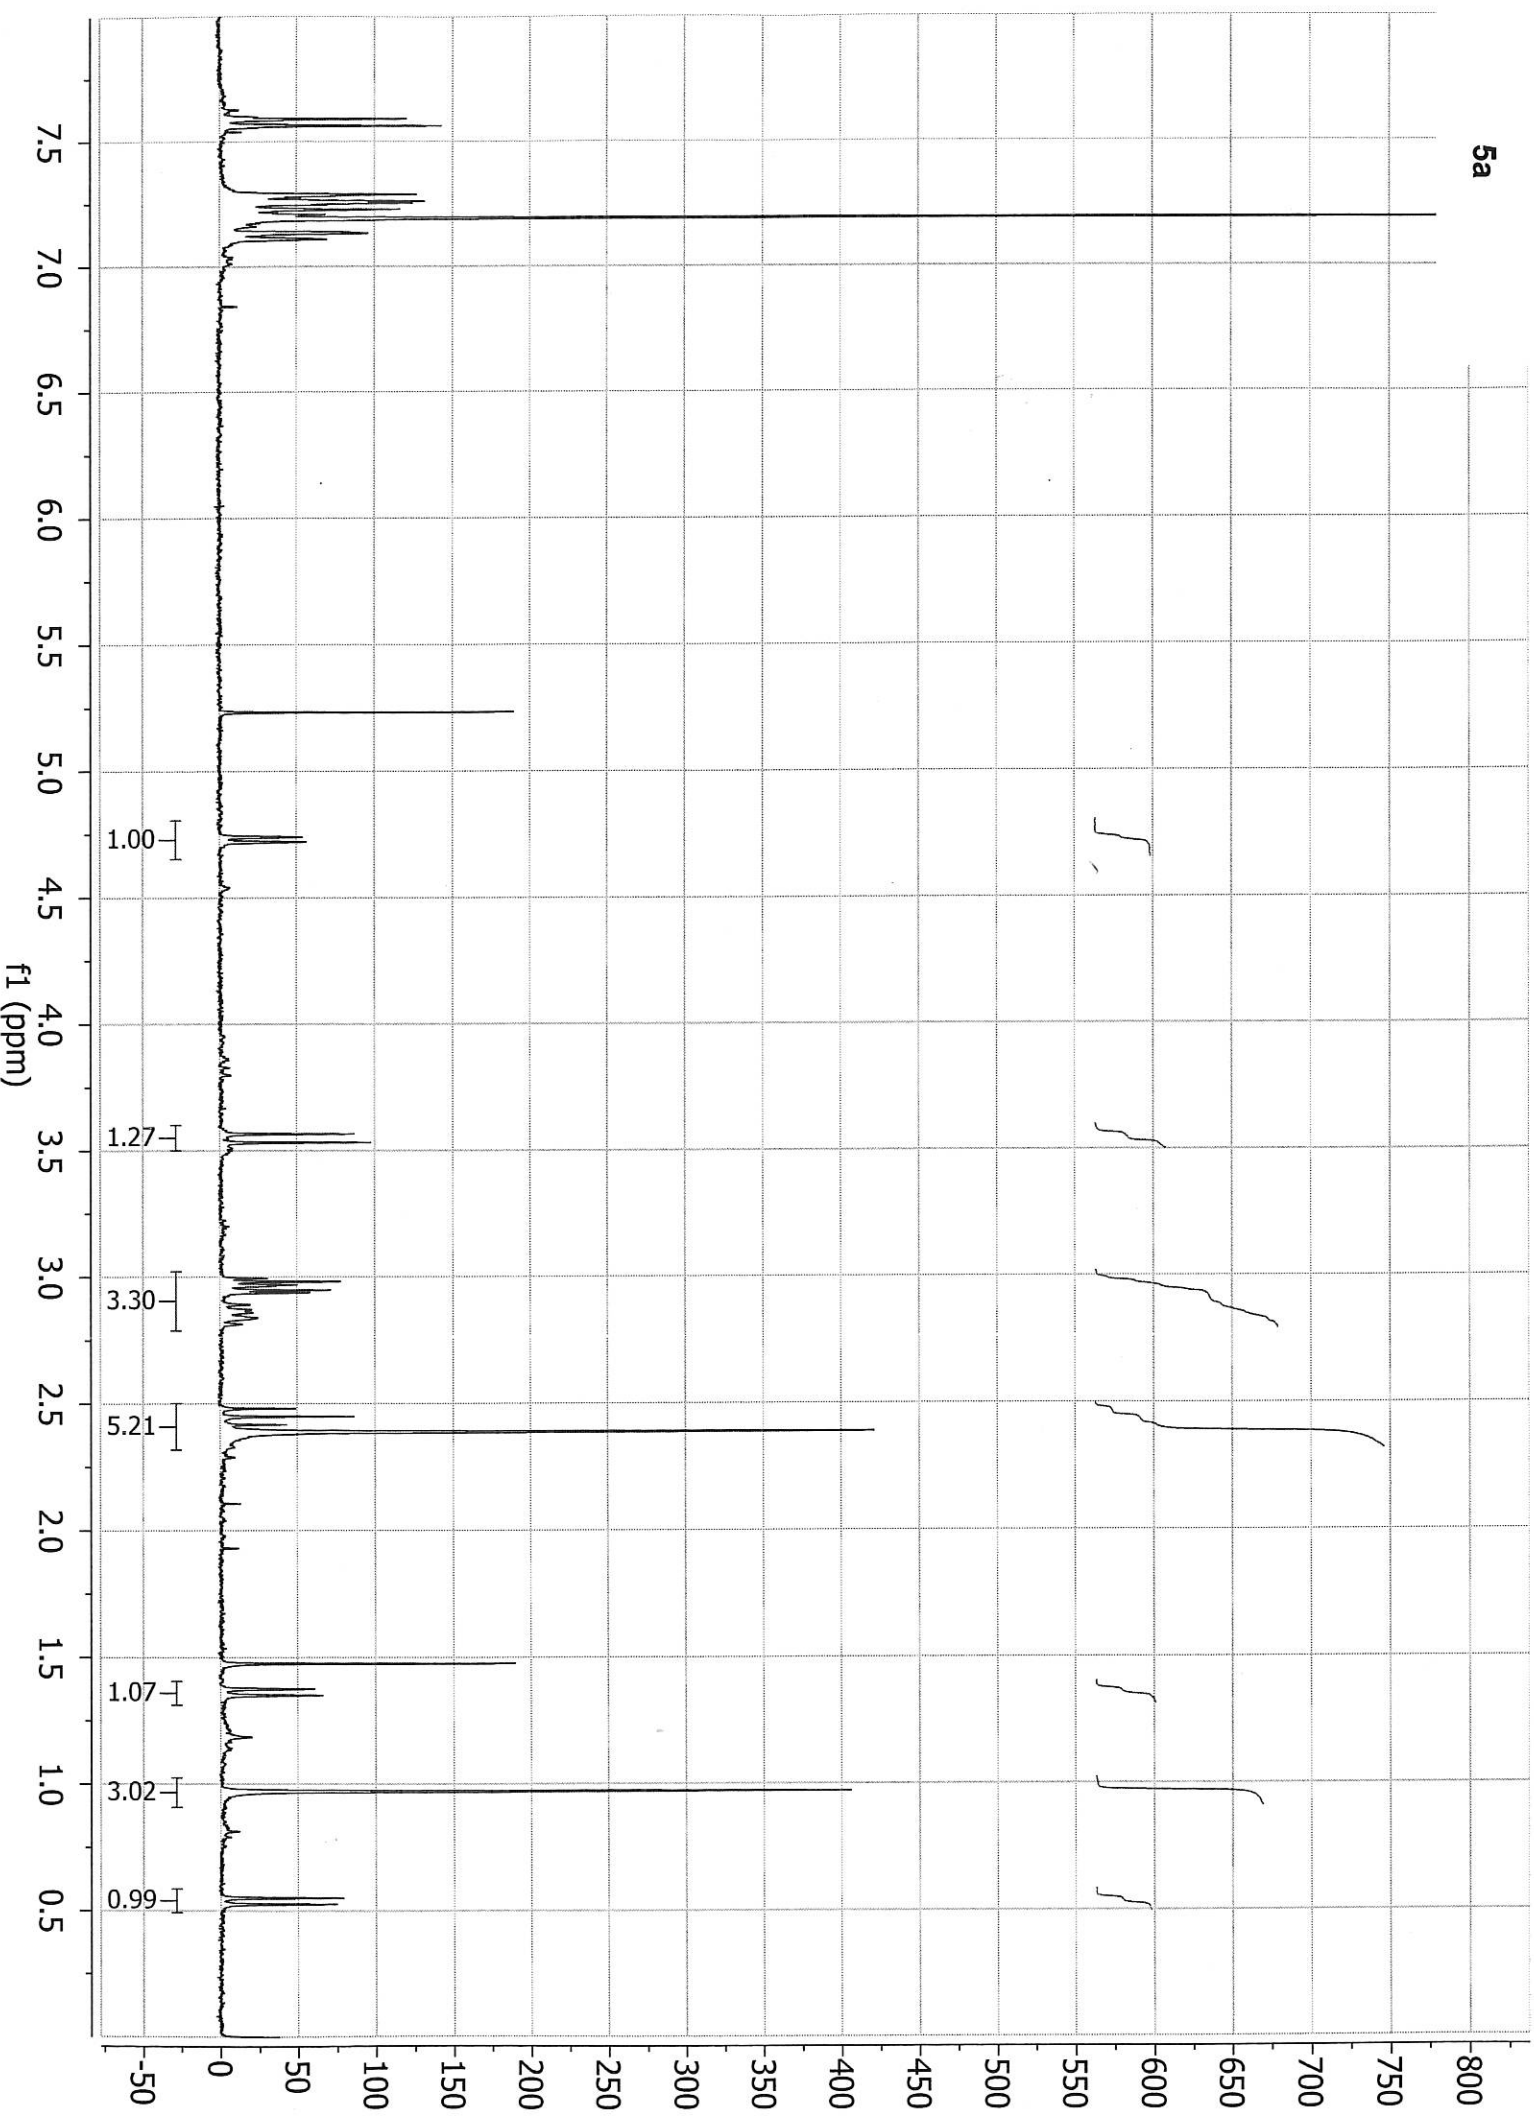

5a

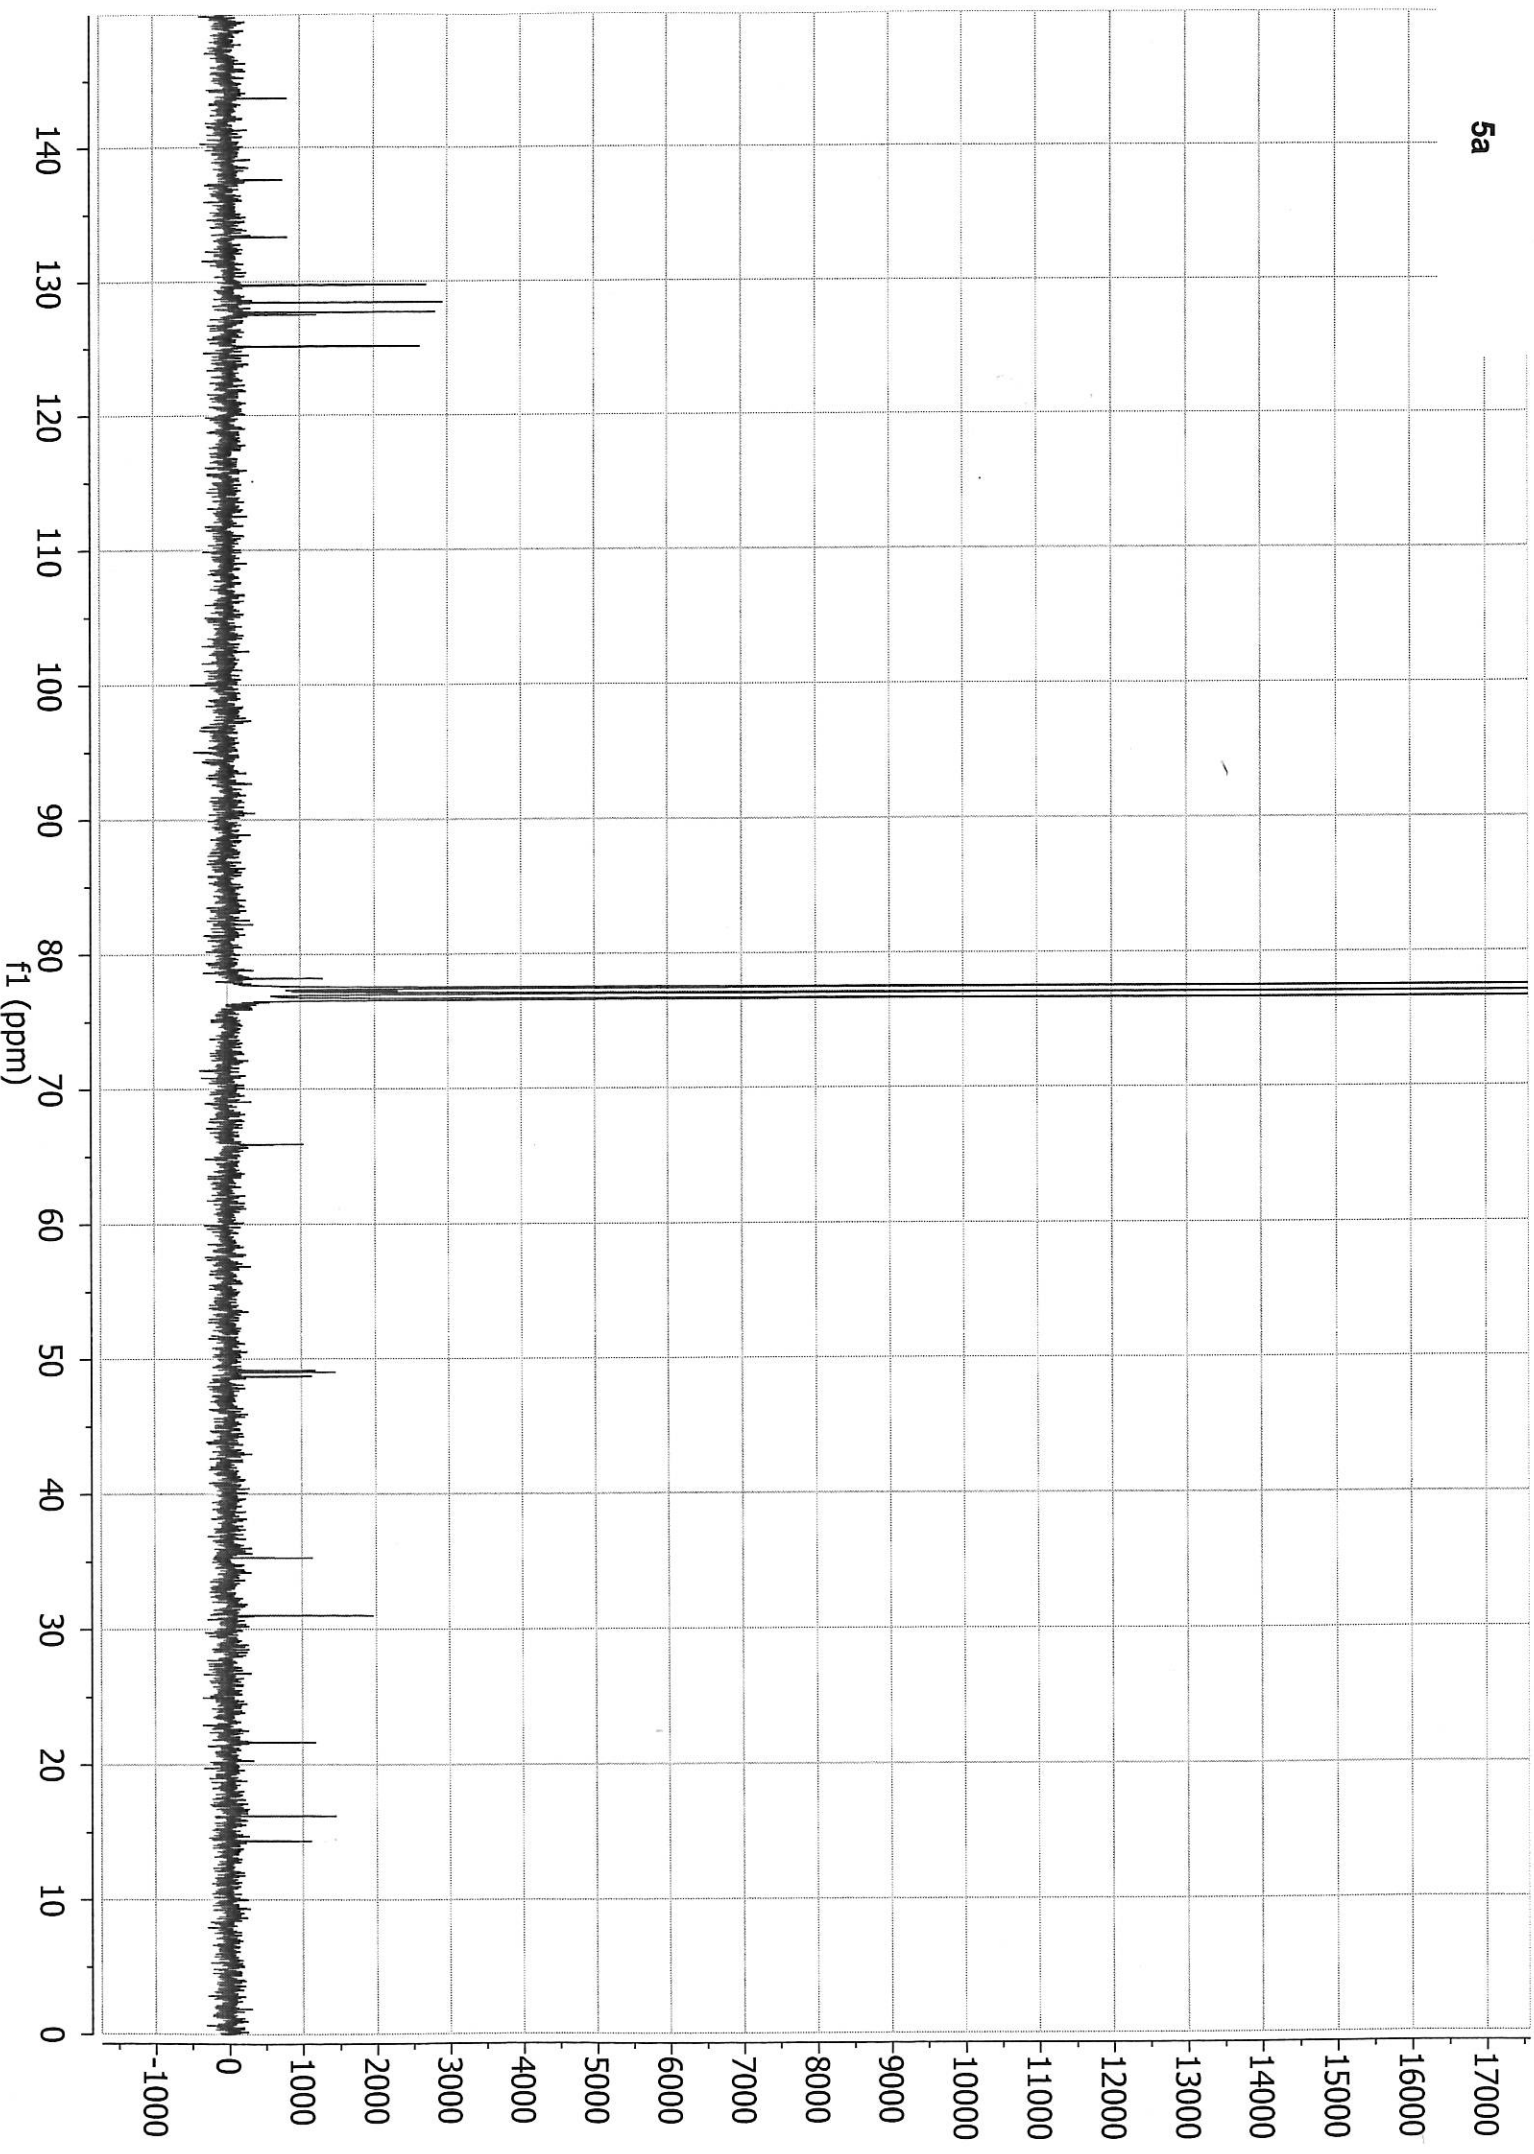

5b

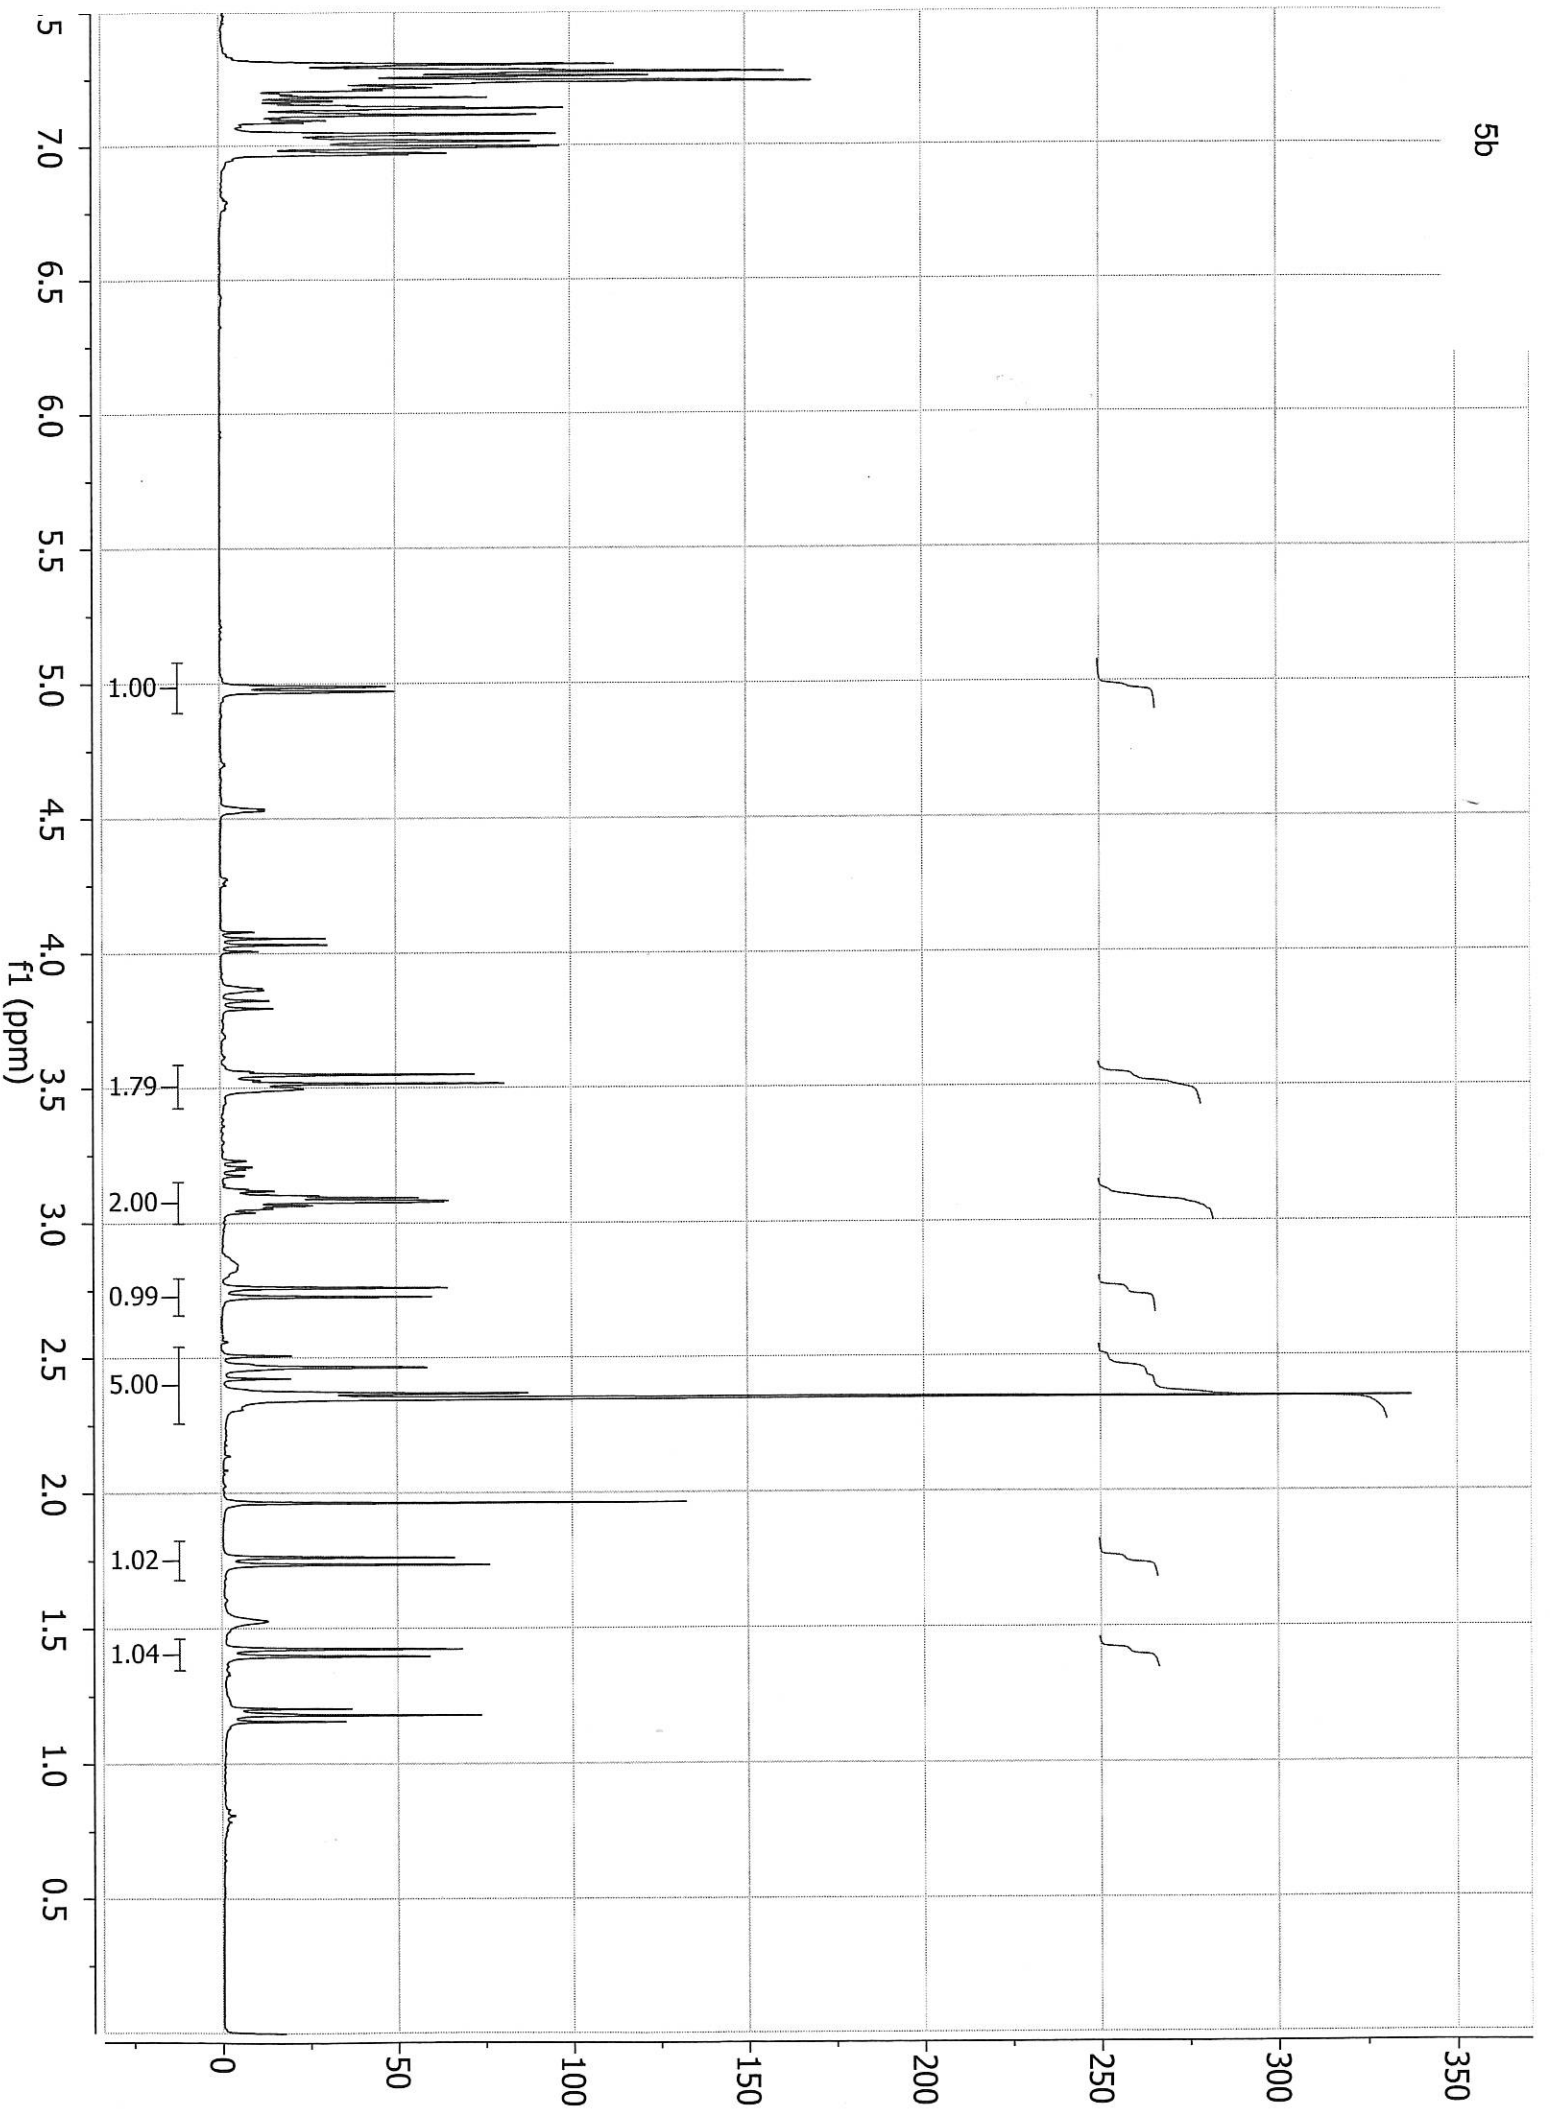

5c

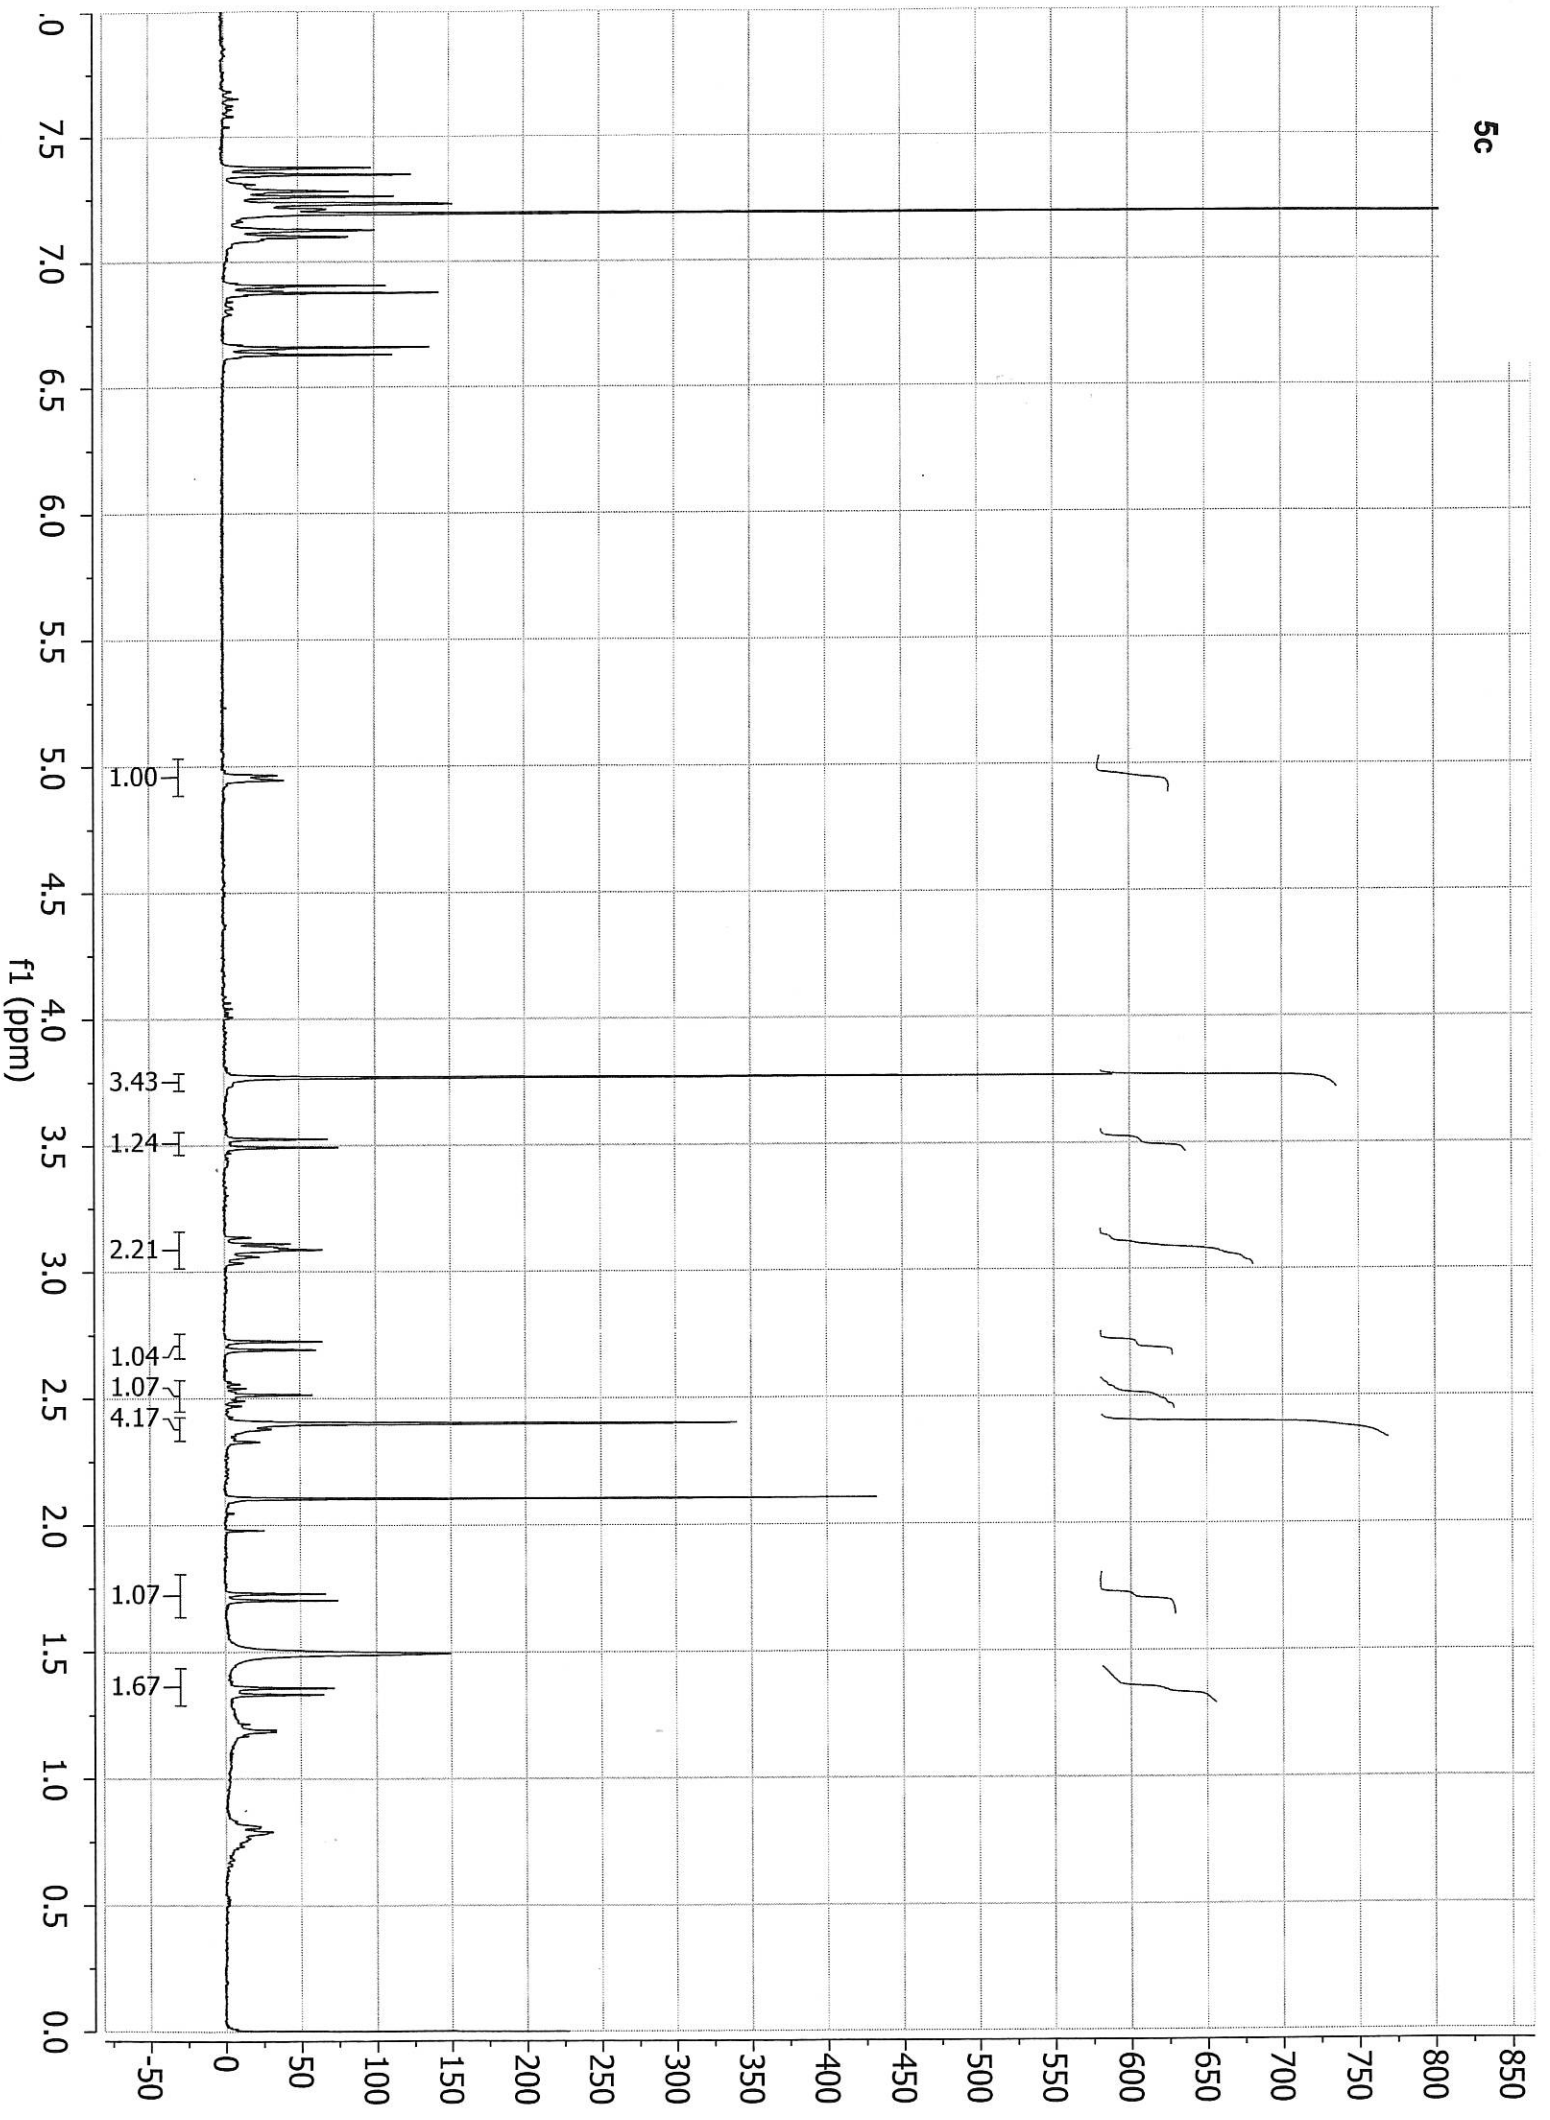



Compound 5c

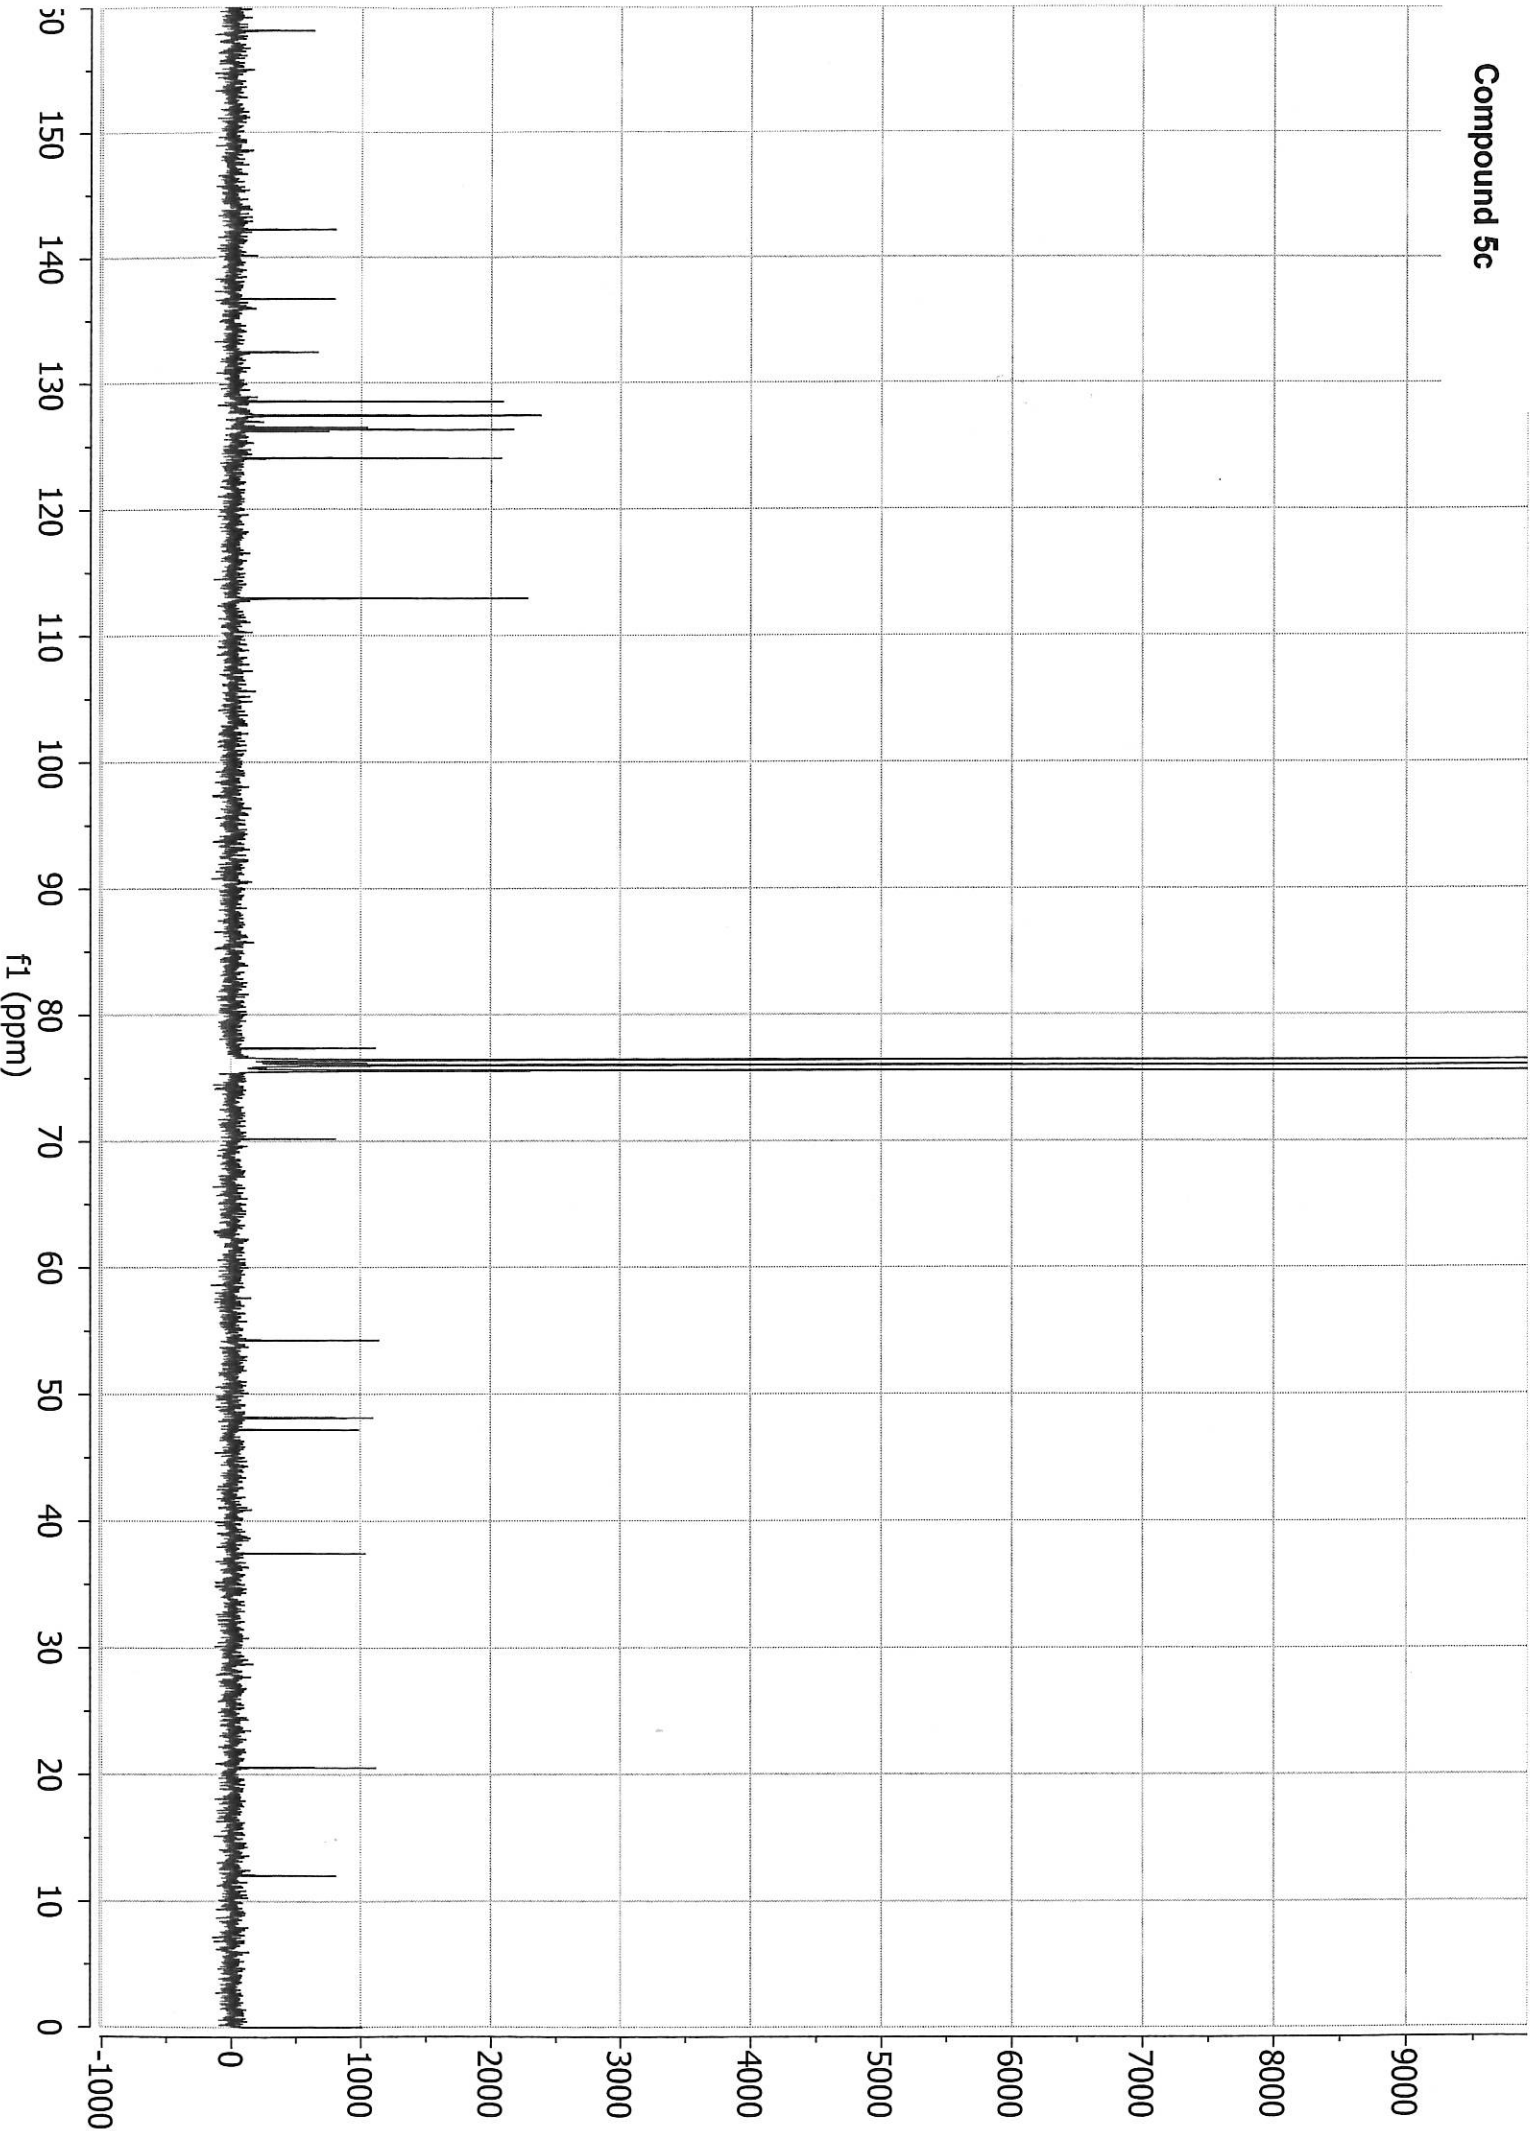

Compound 5d

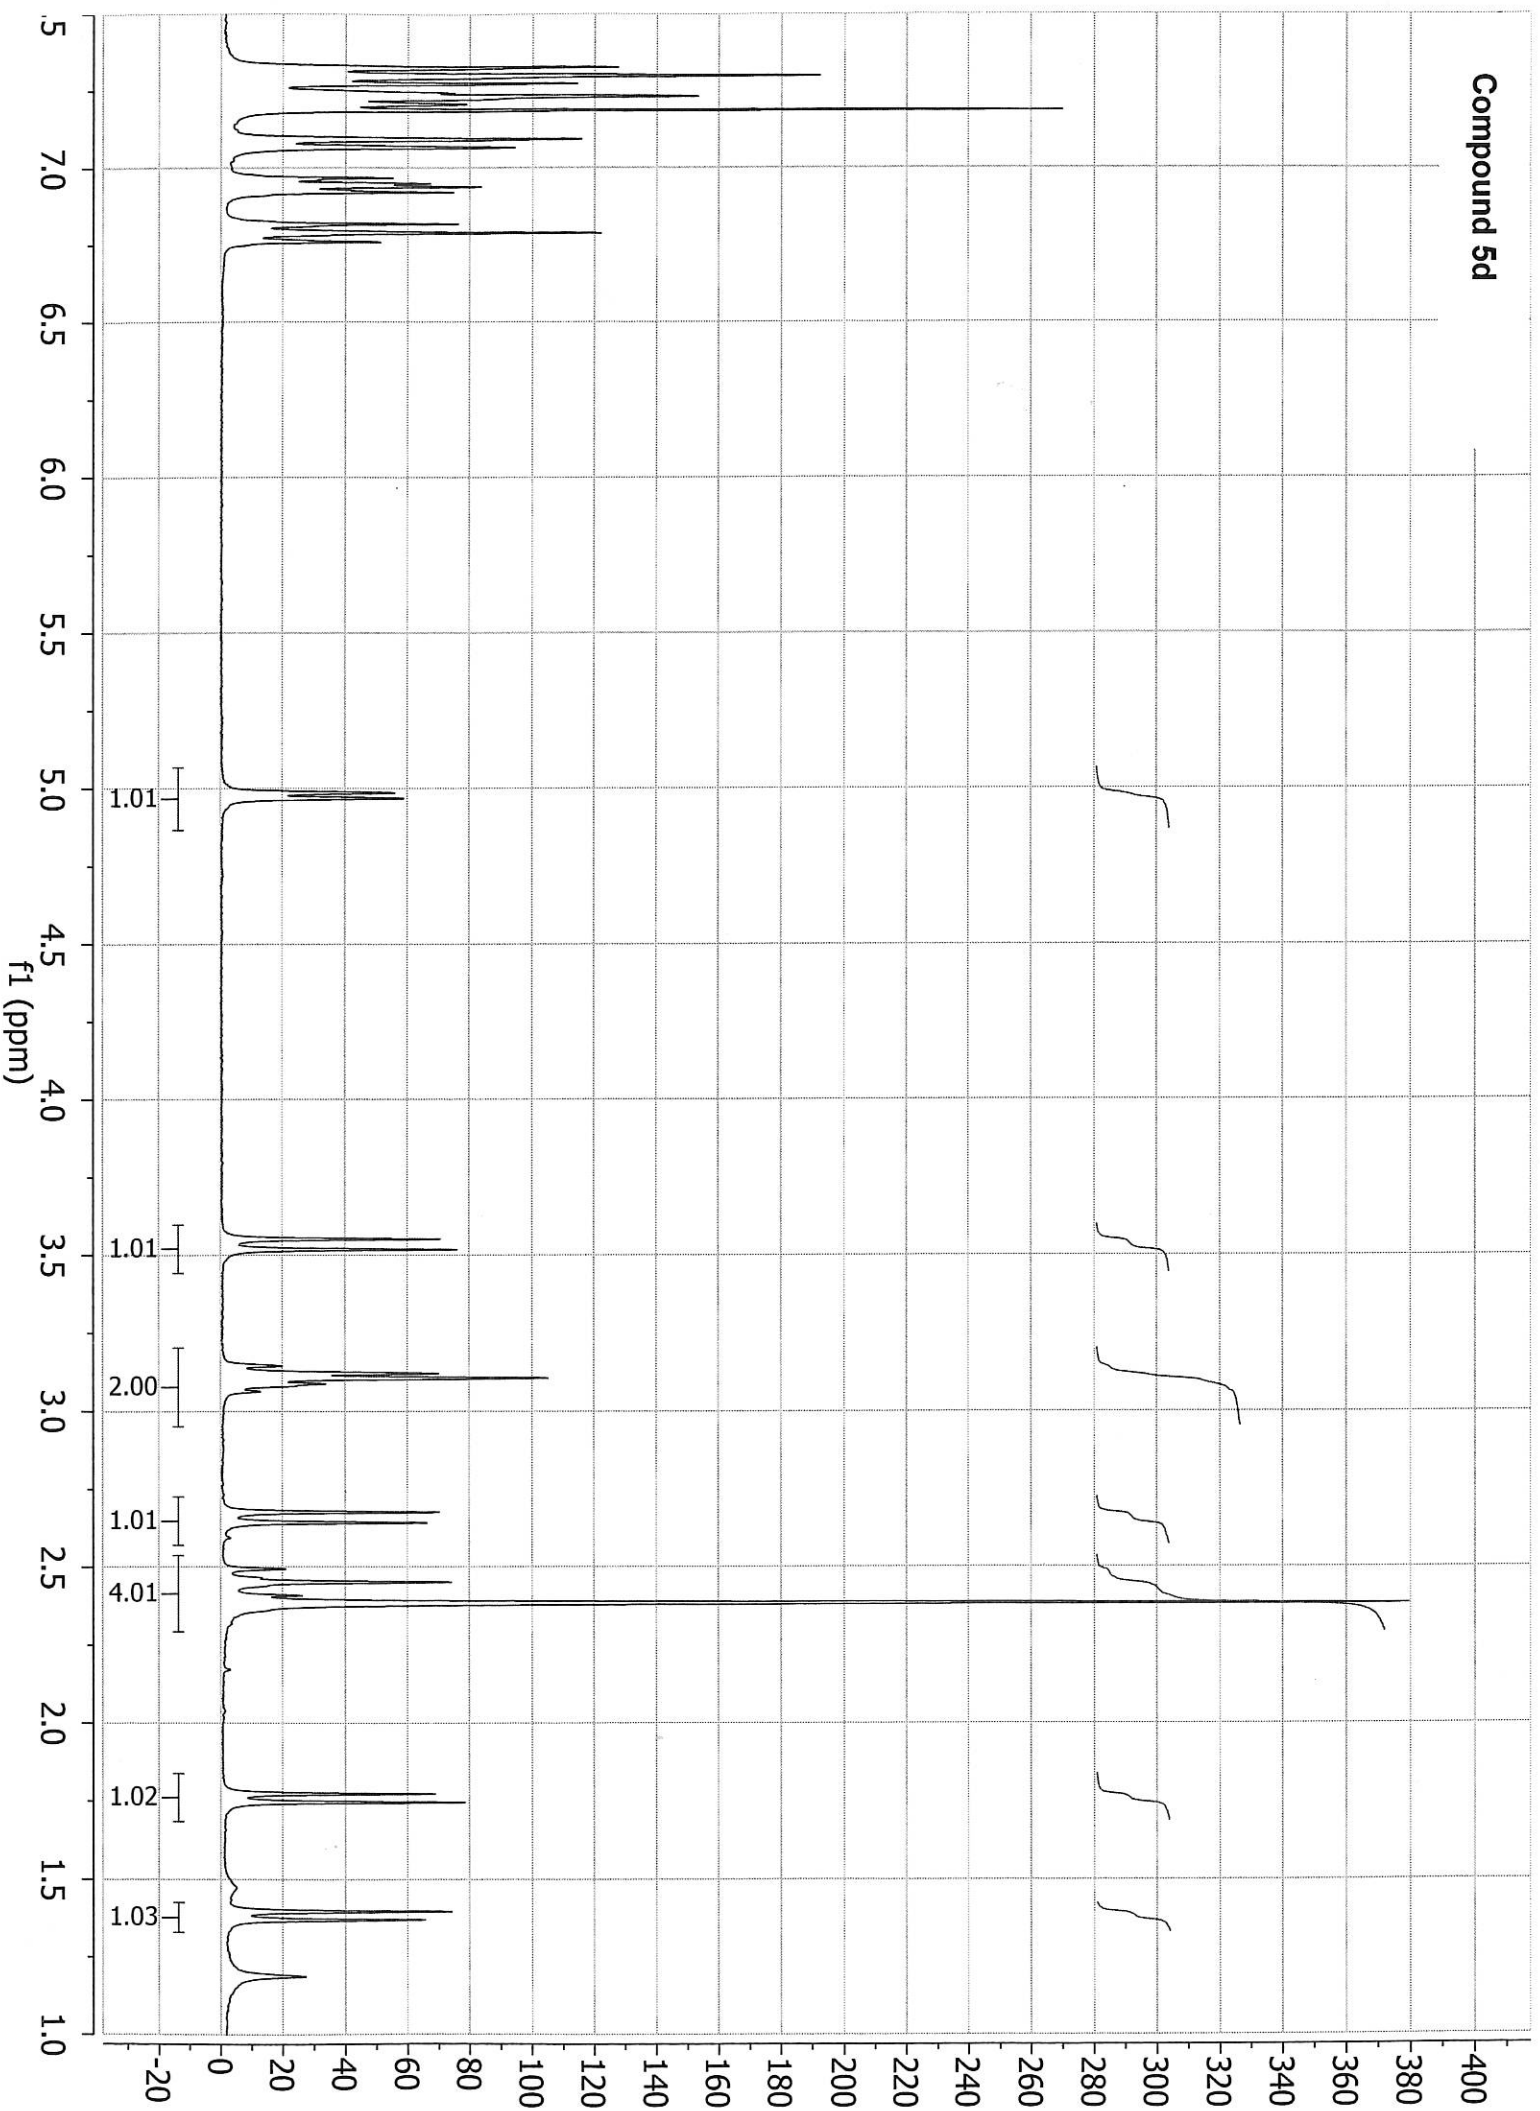

Compound 5d

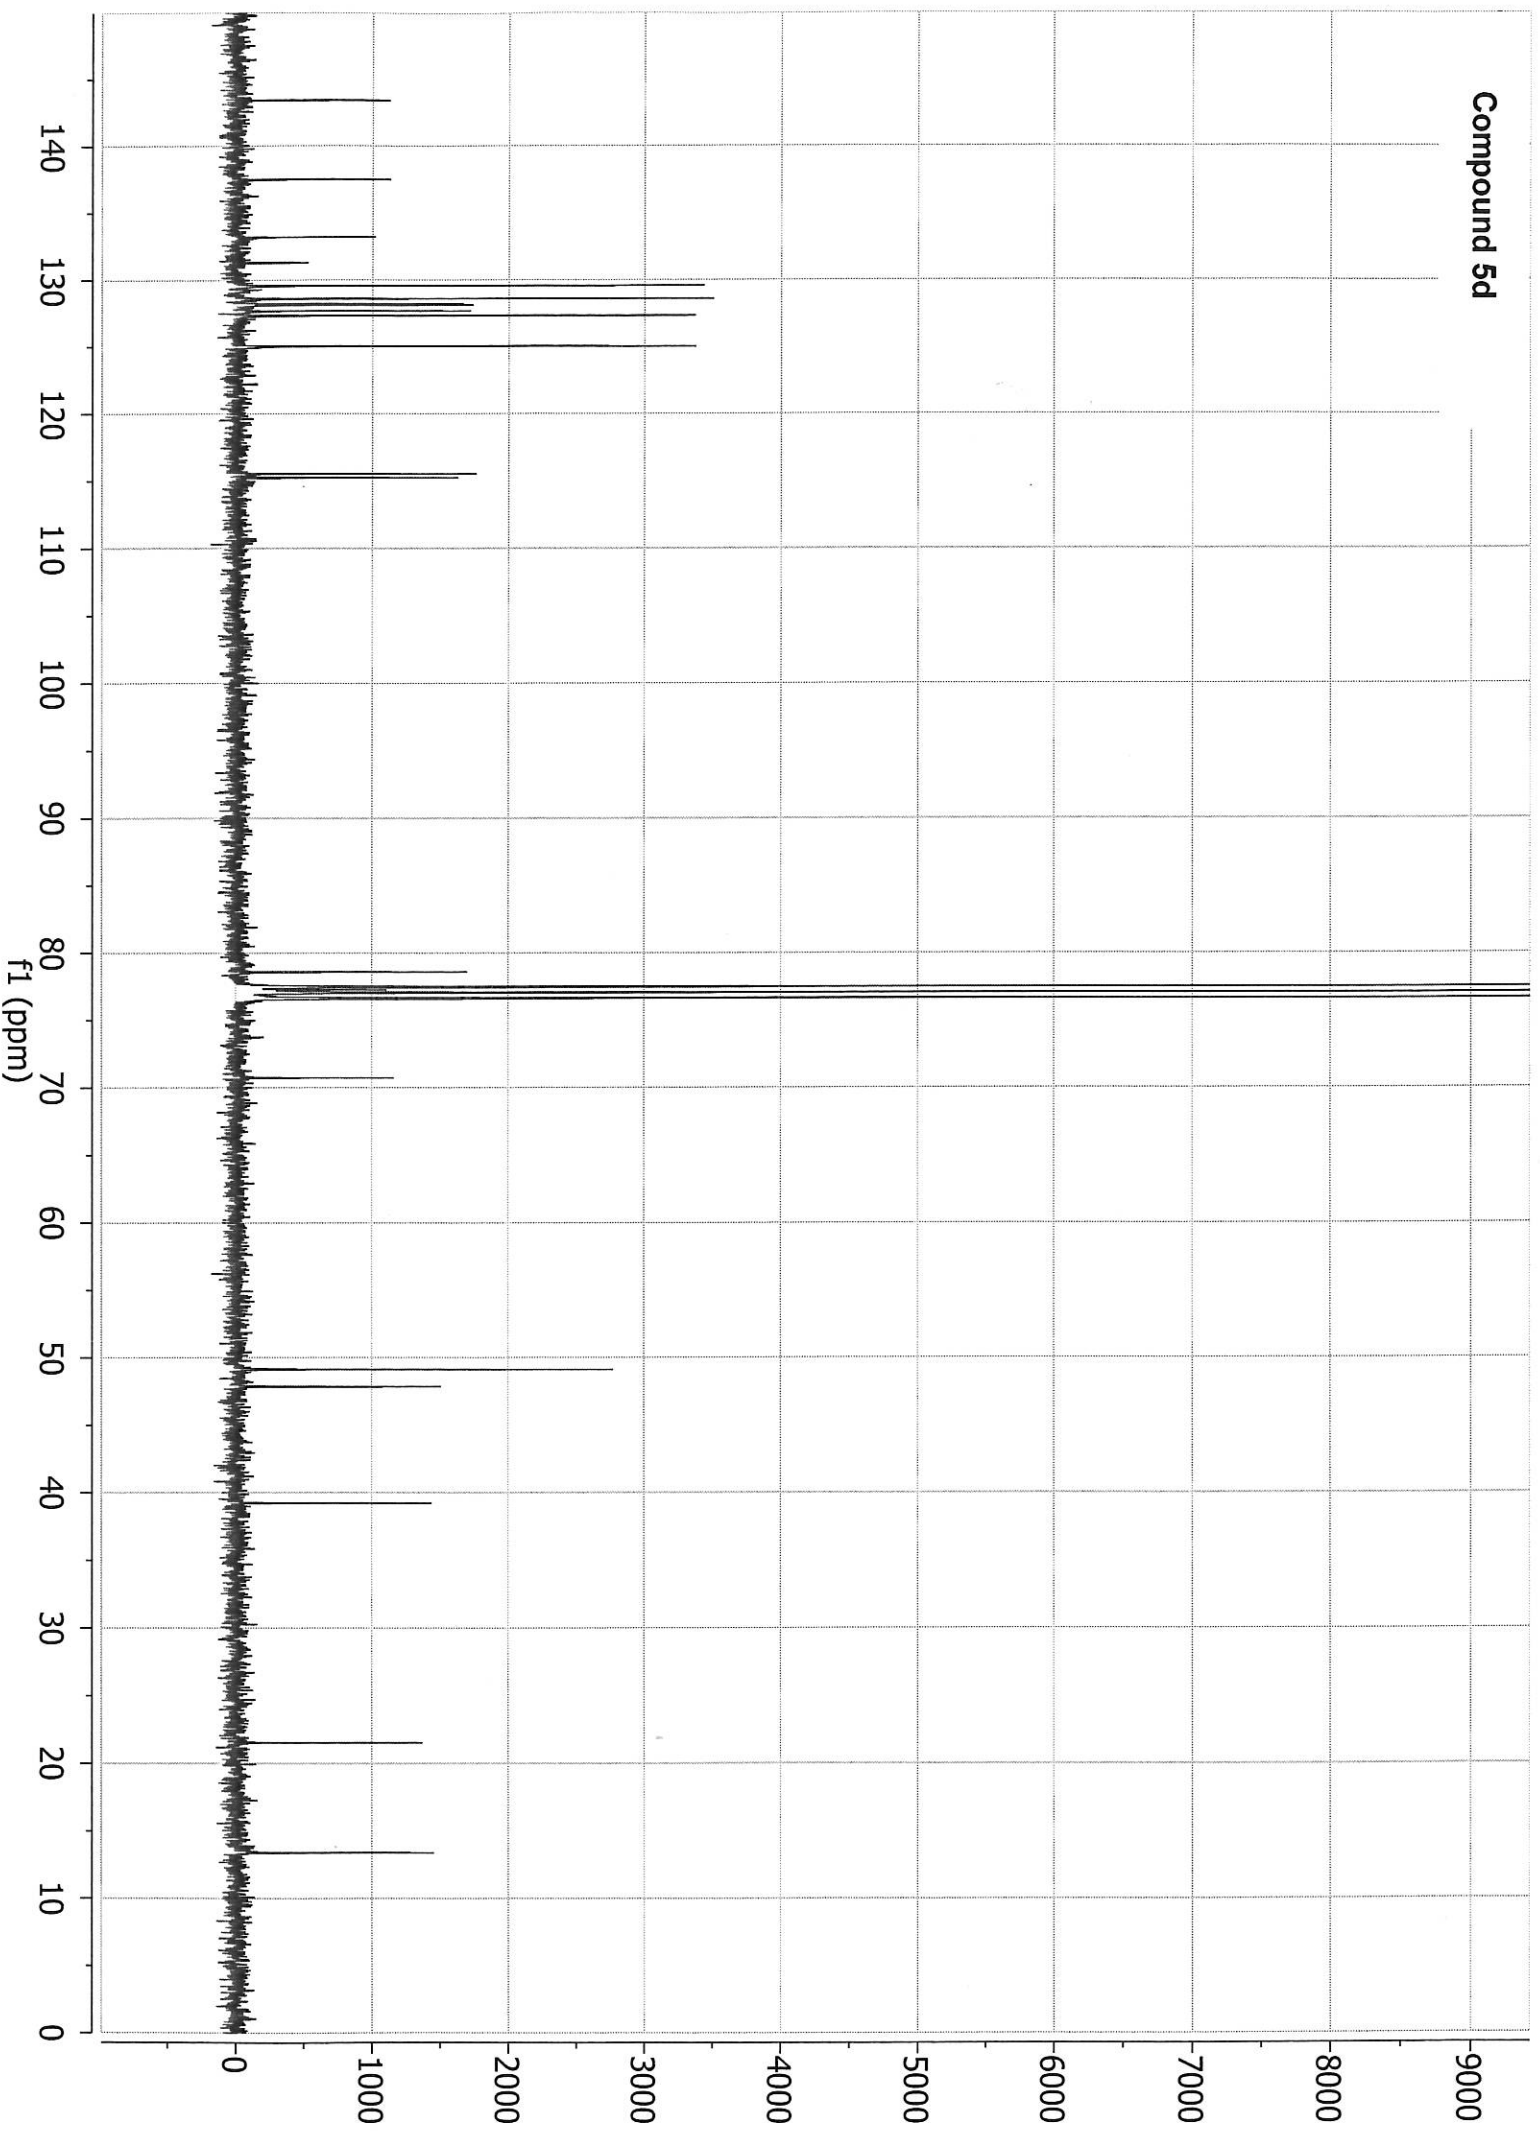

3b

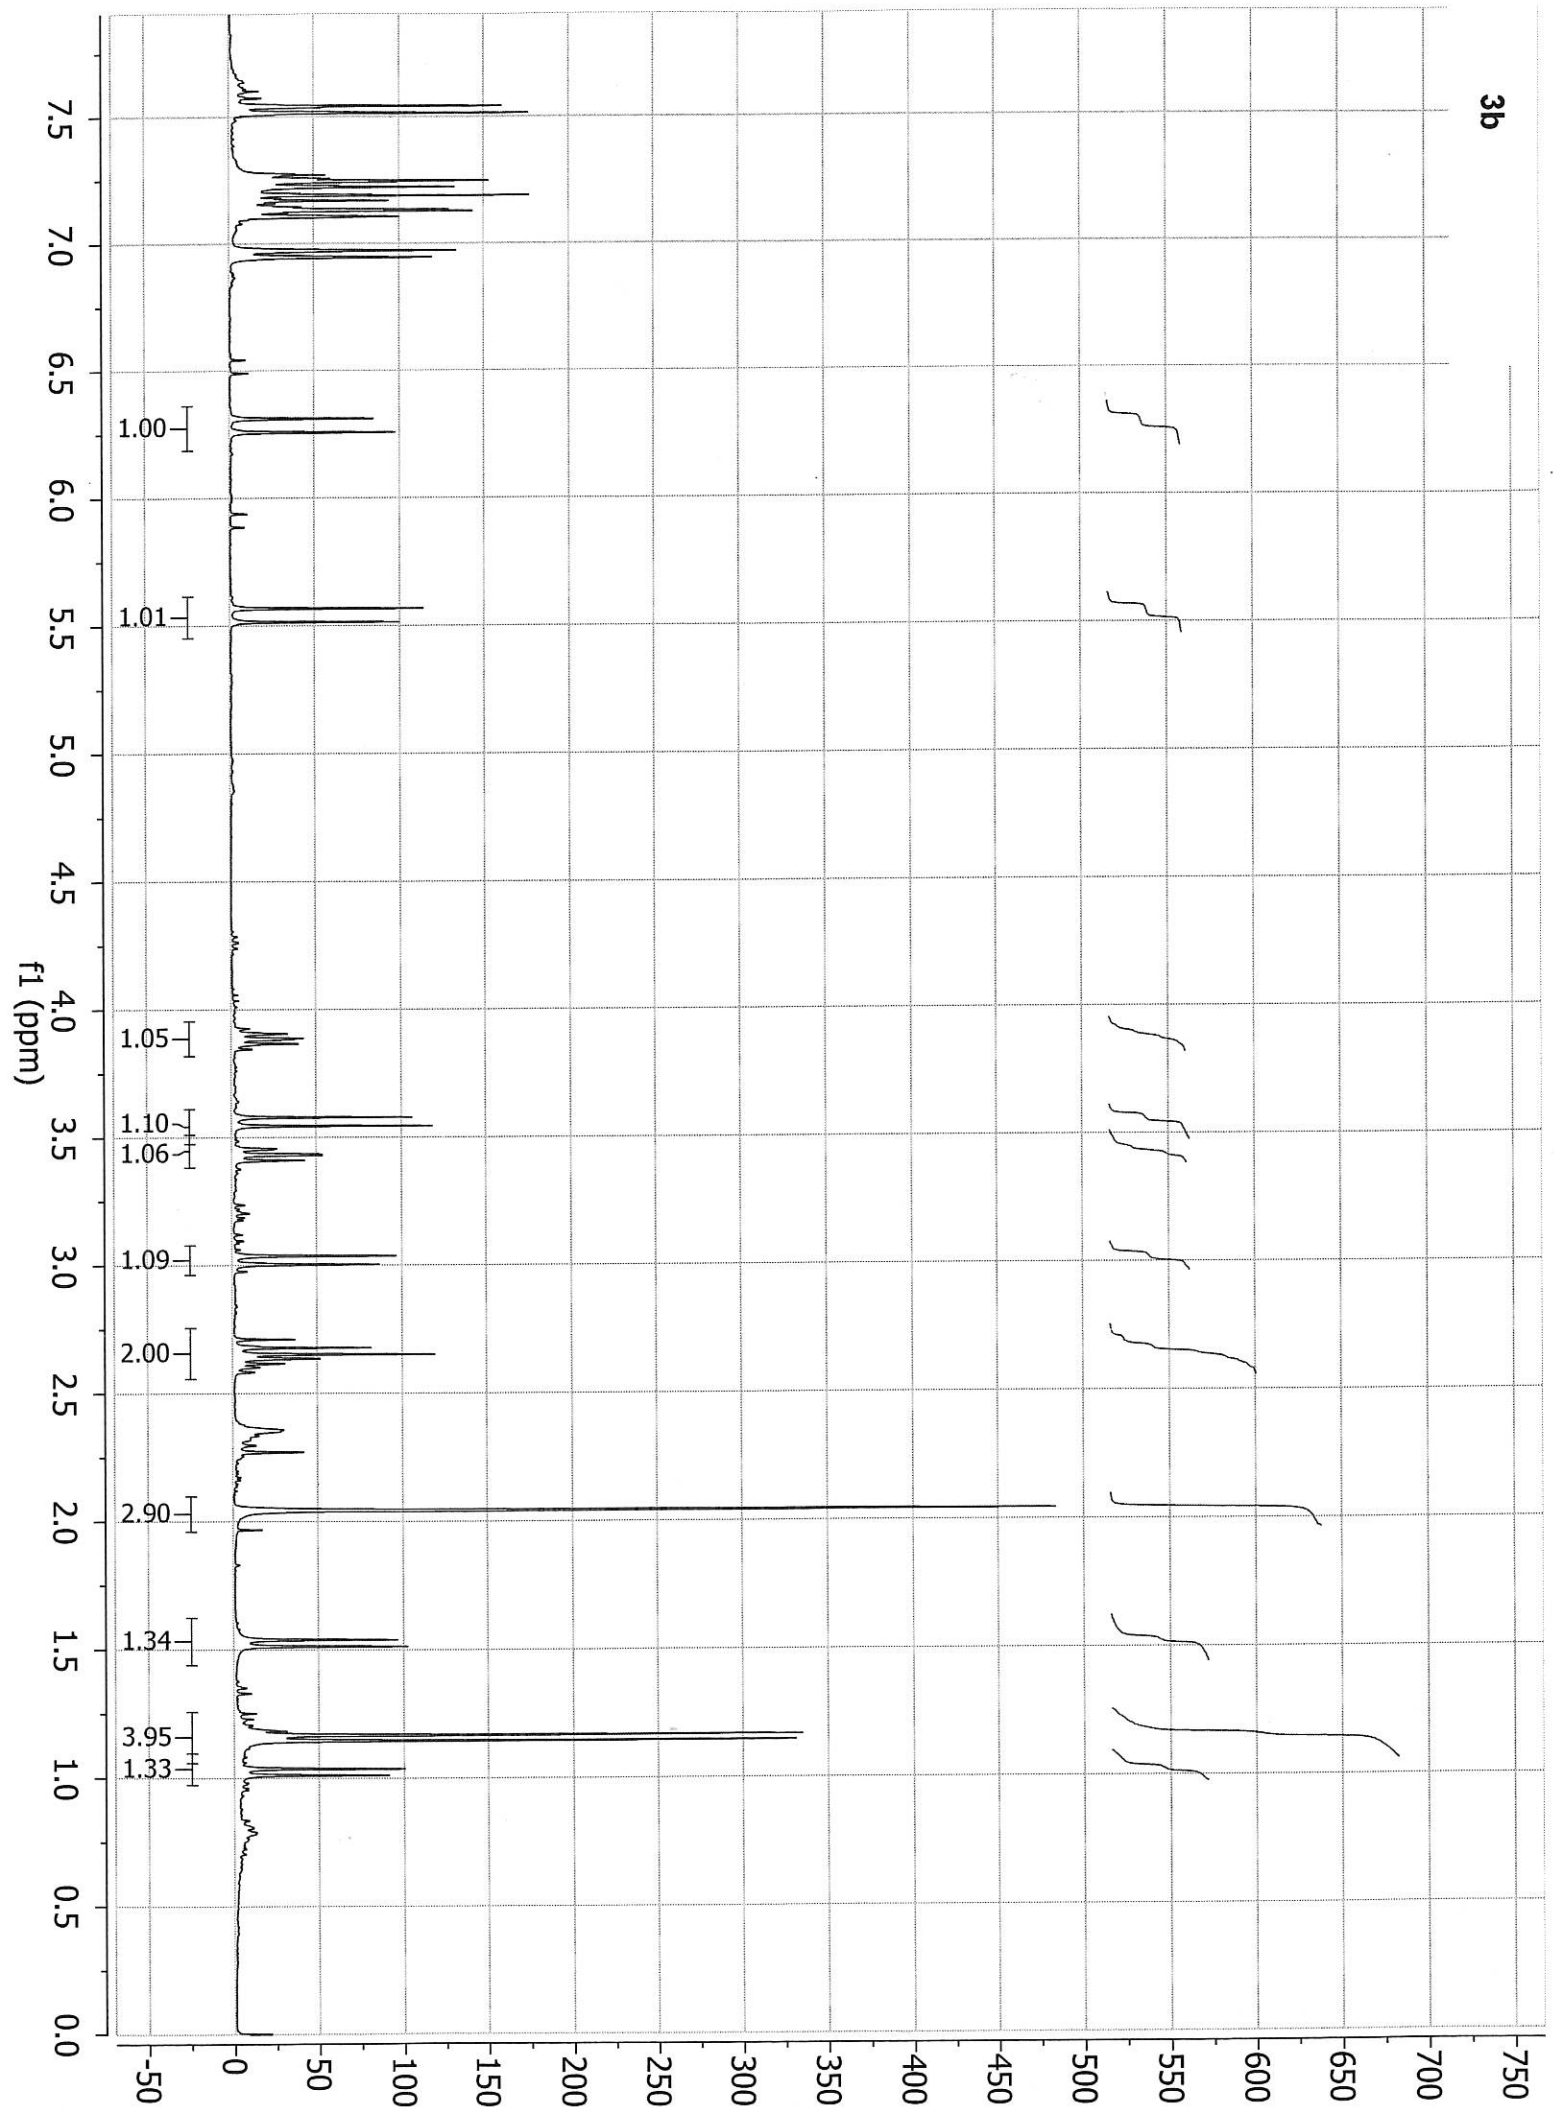

3b

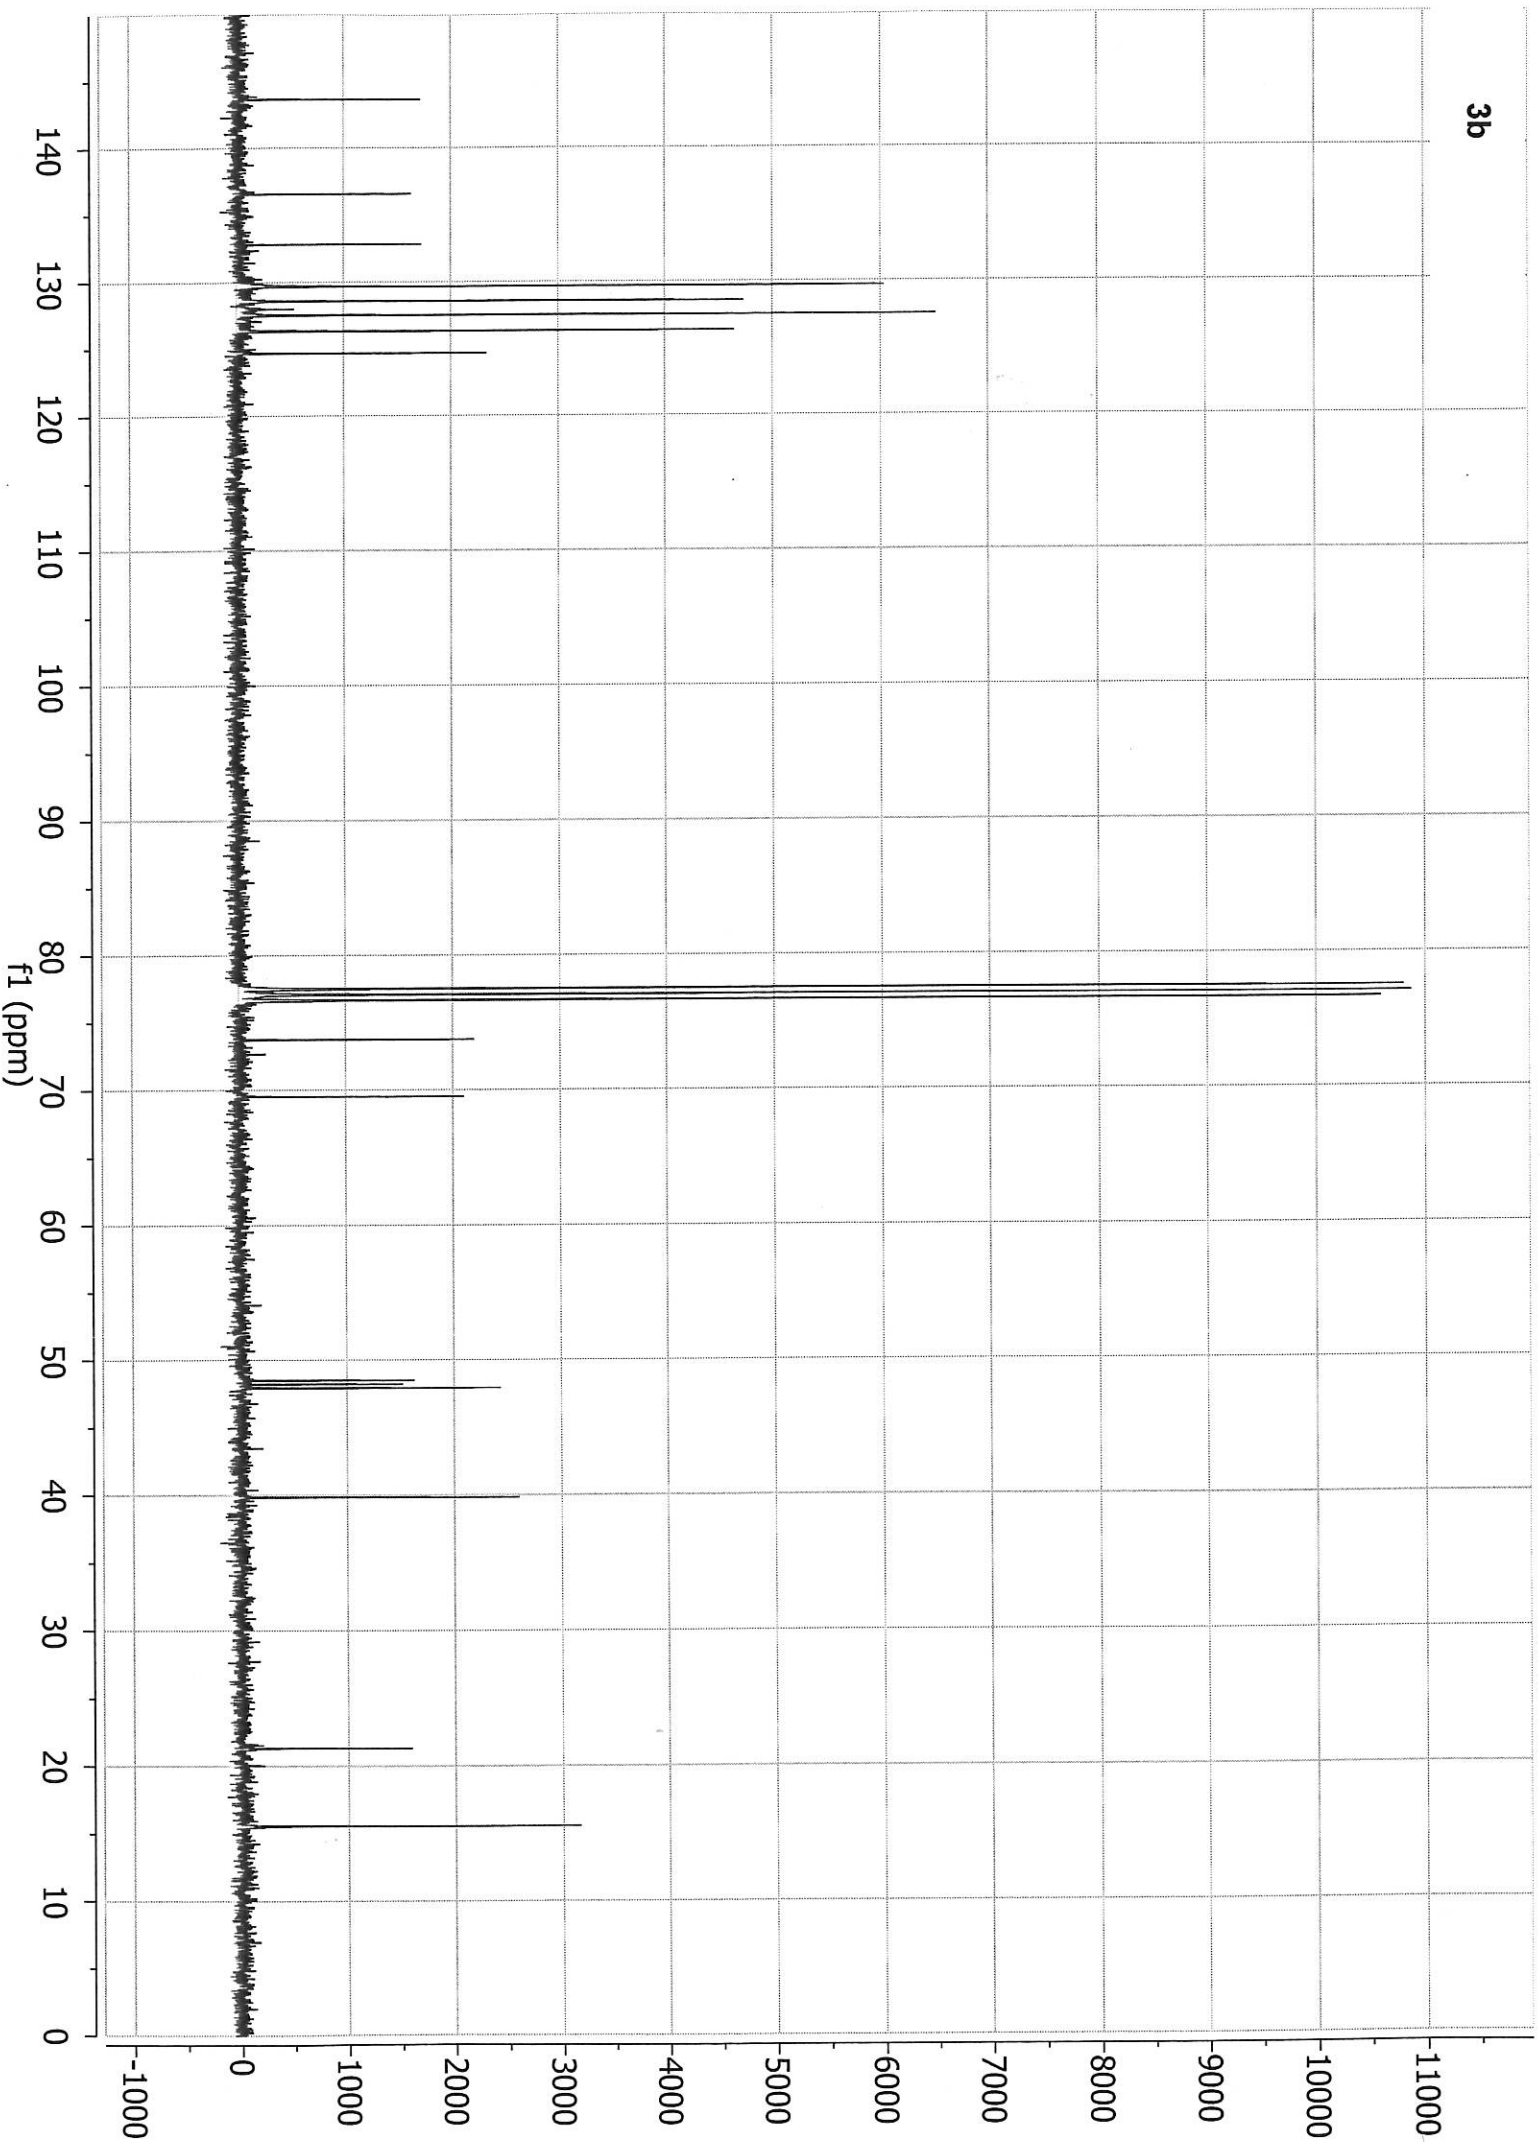

compound 3g

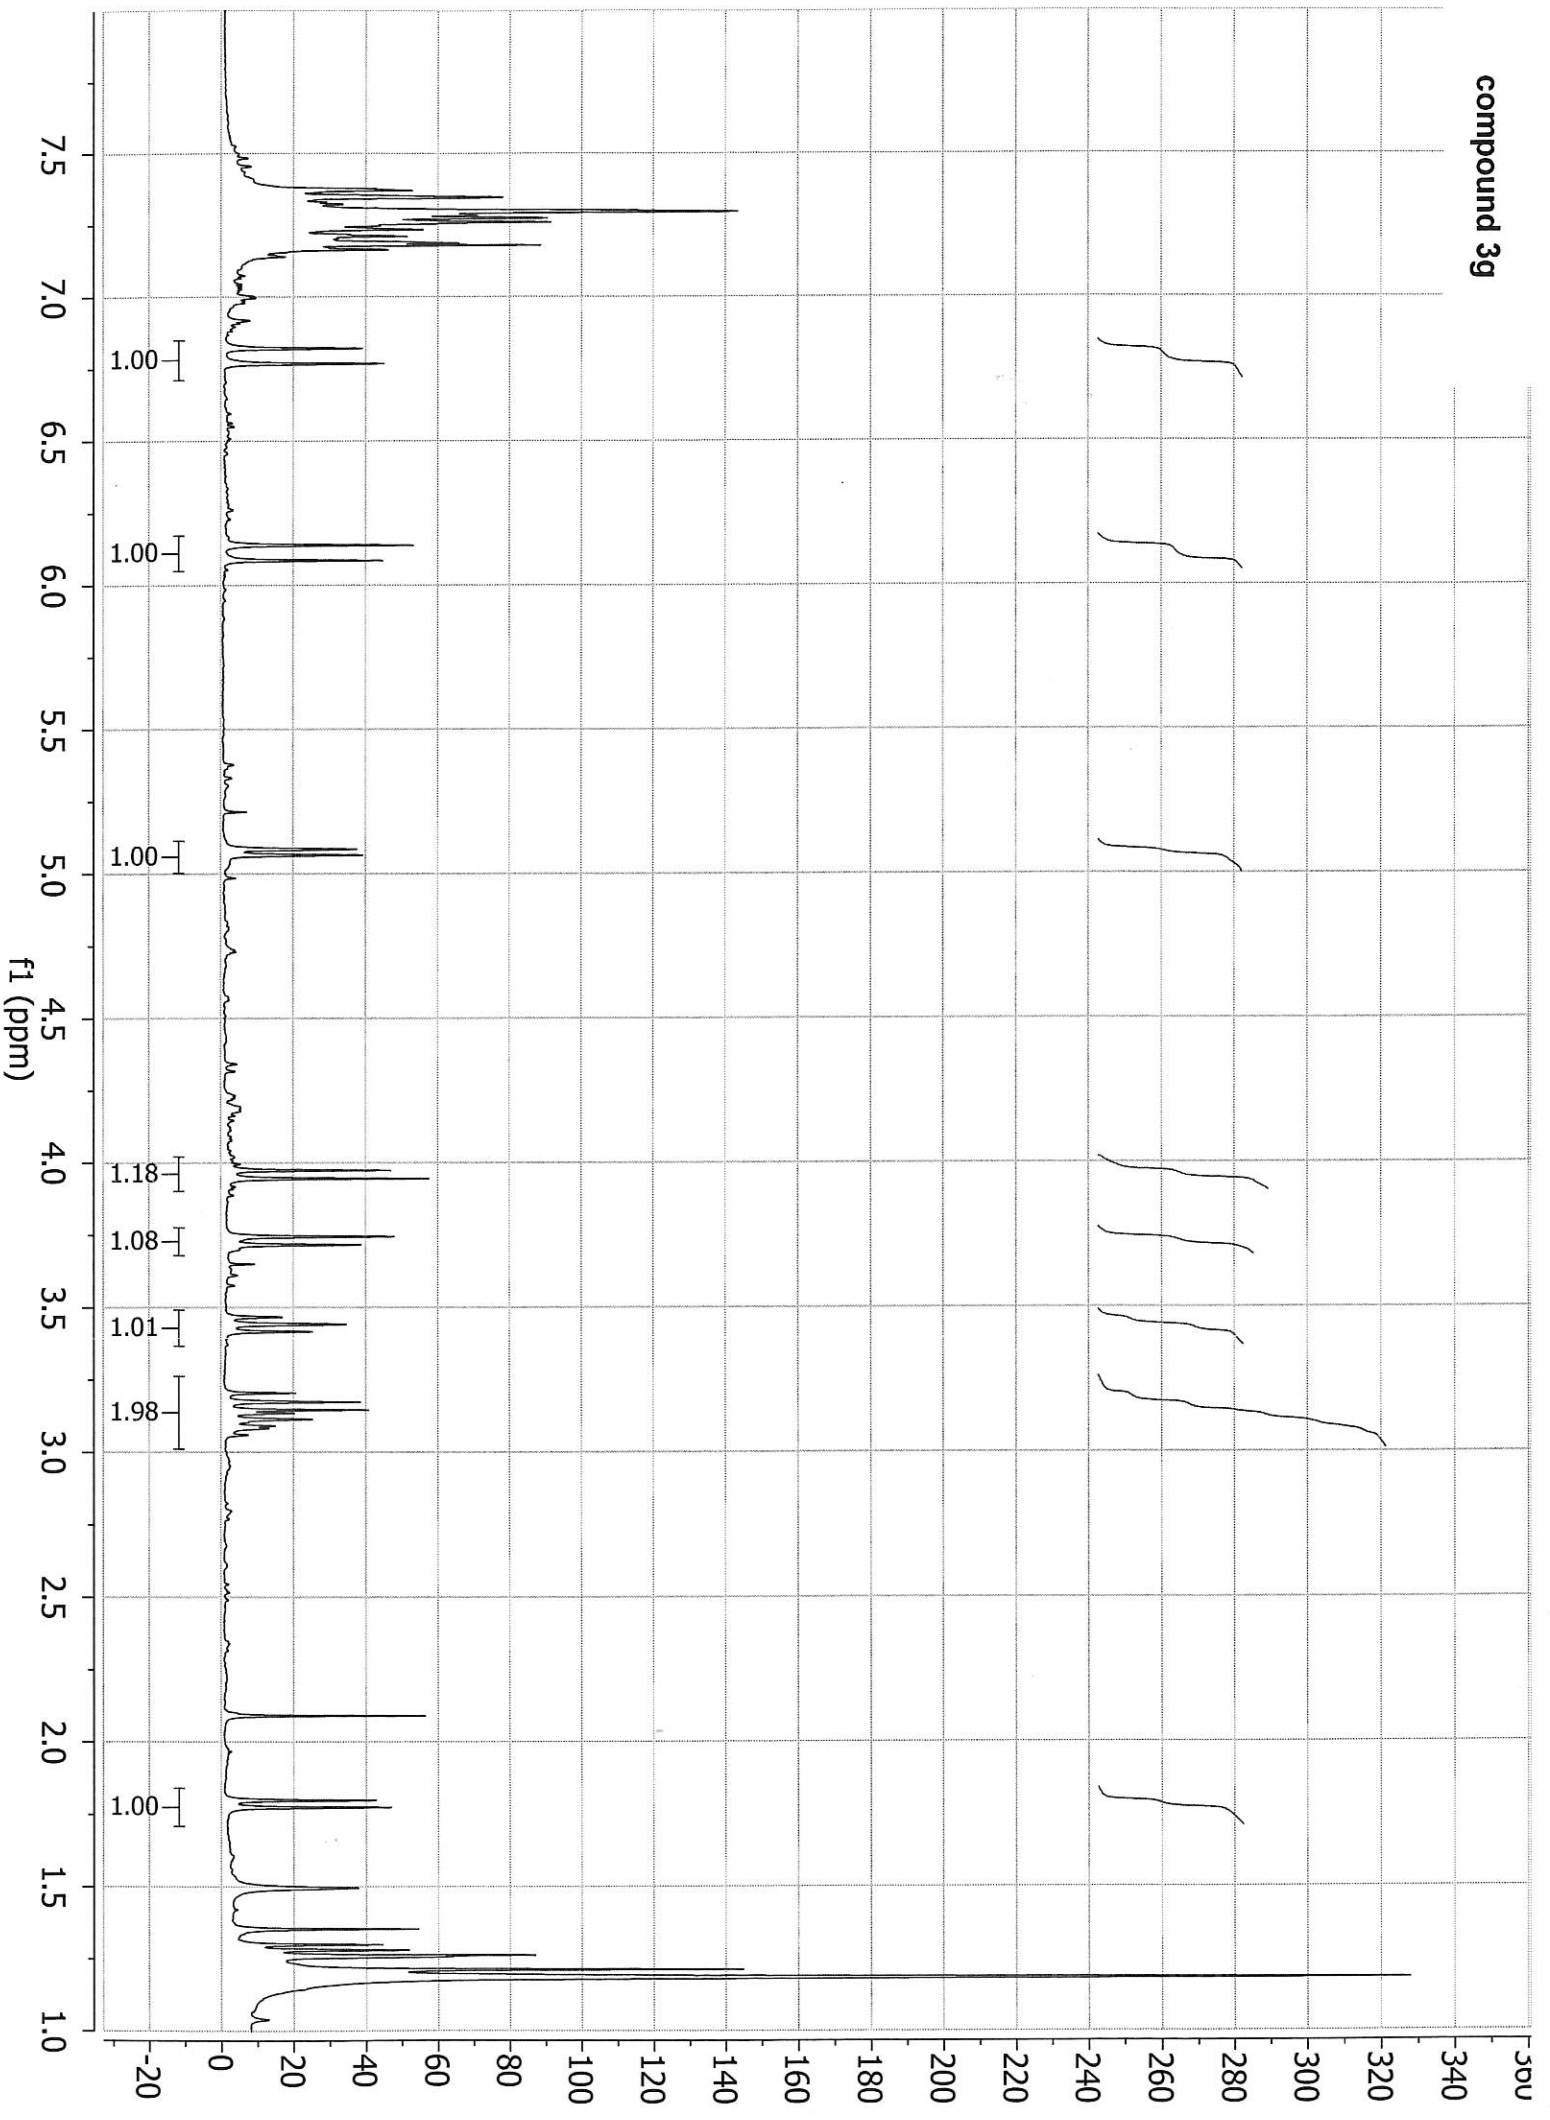

compound 3 g

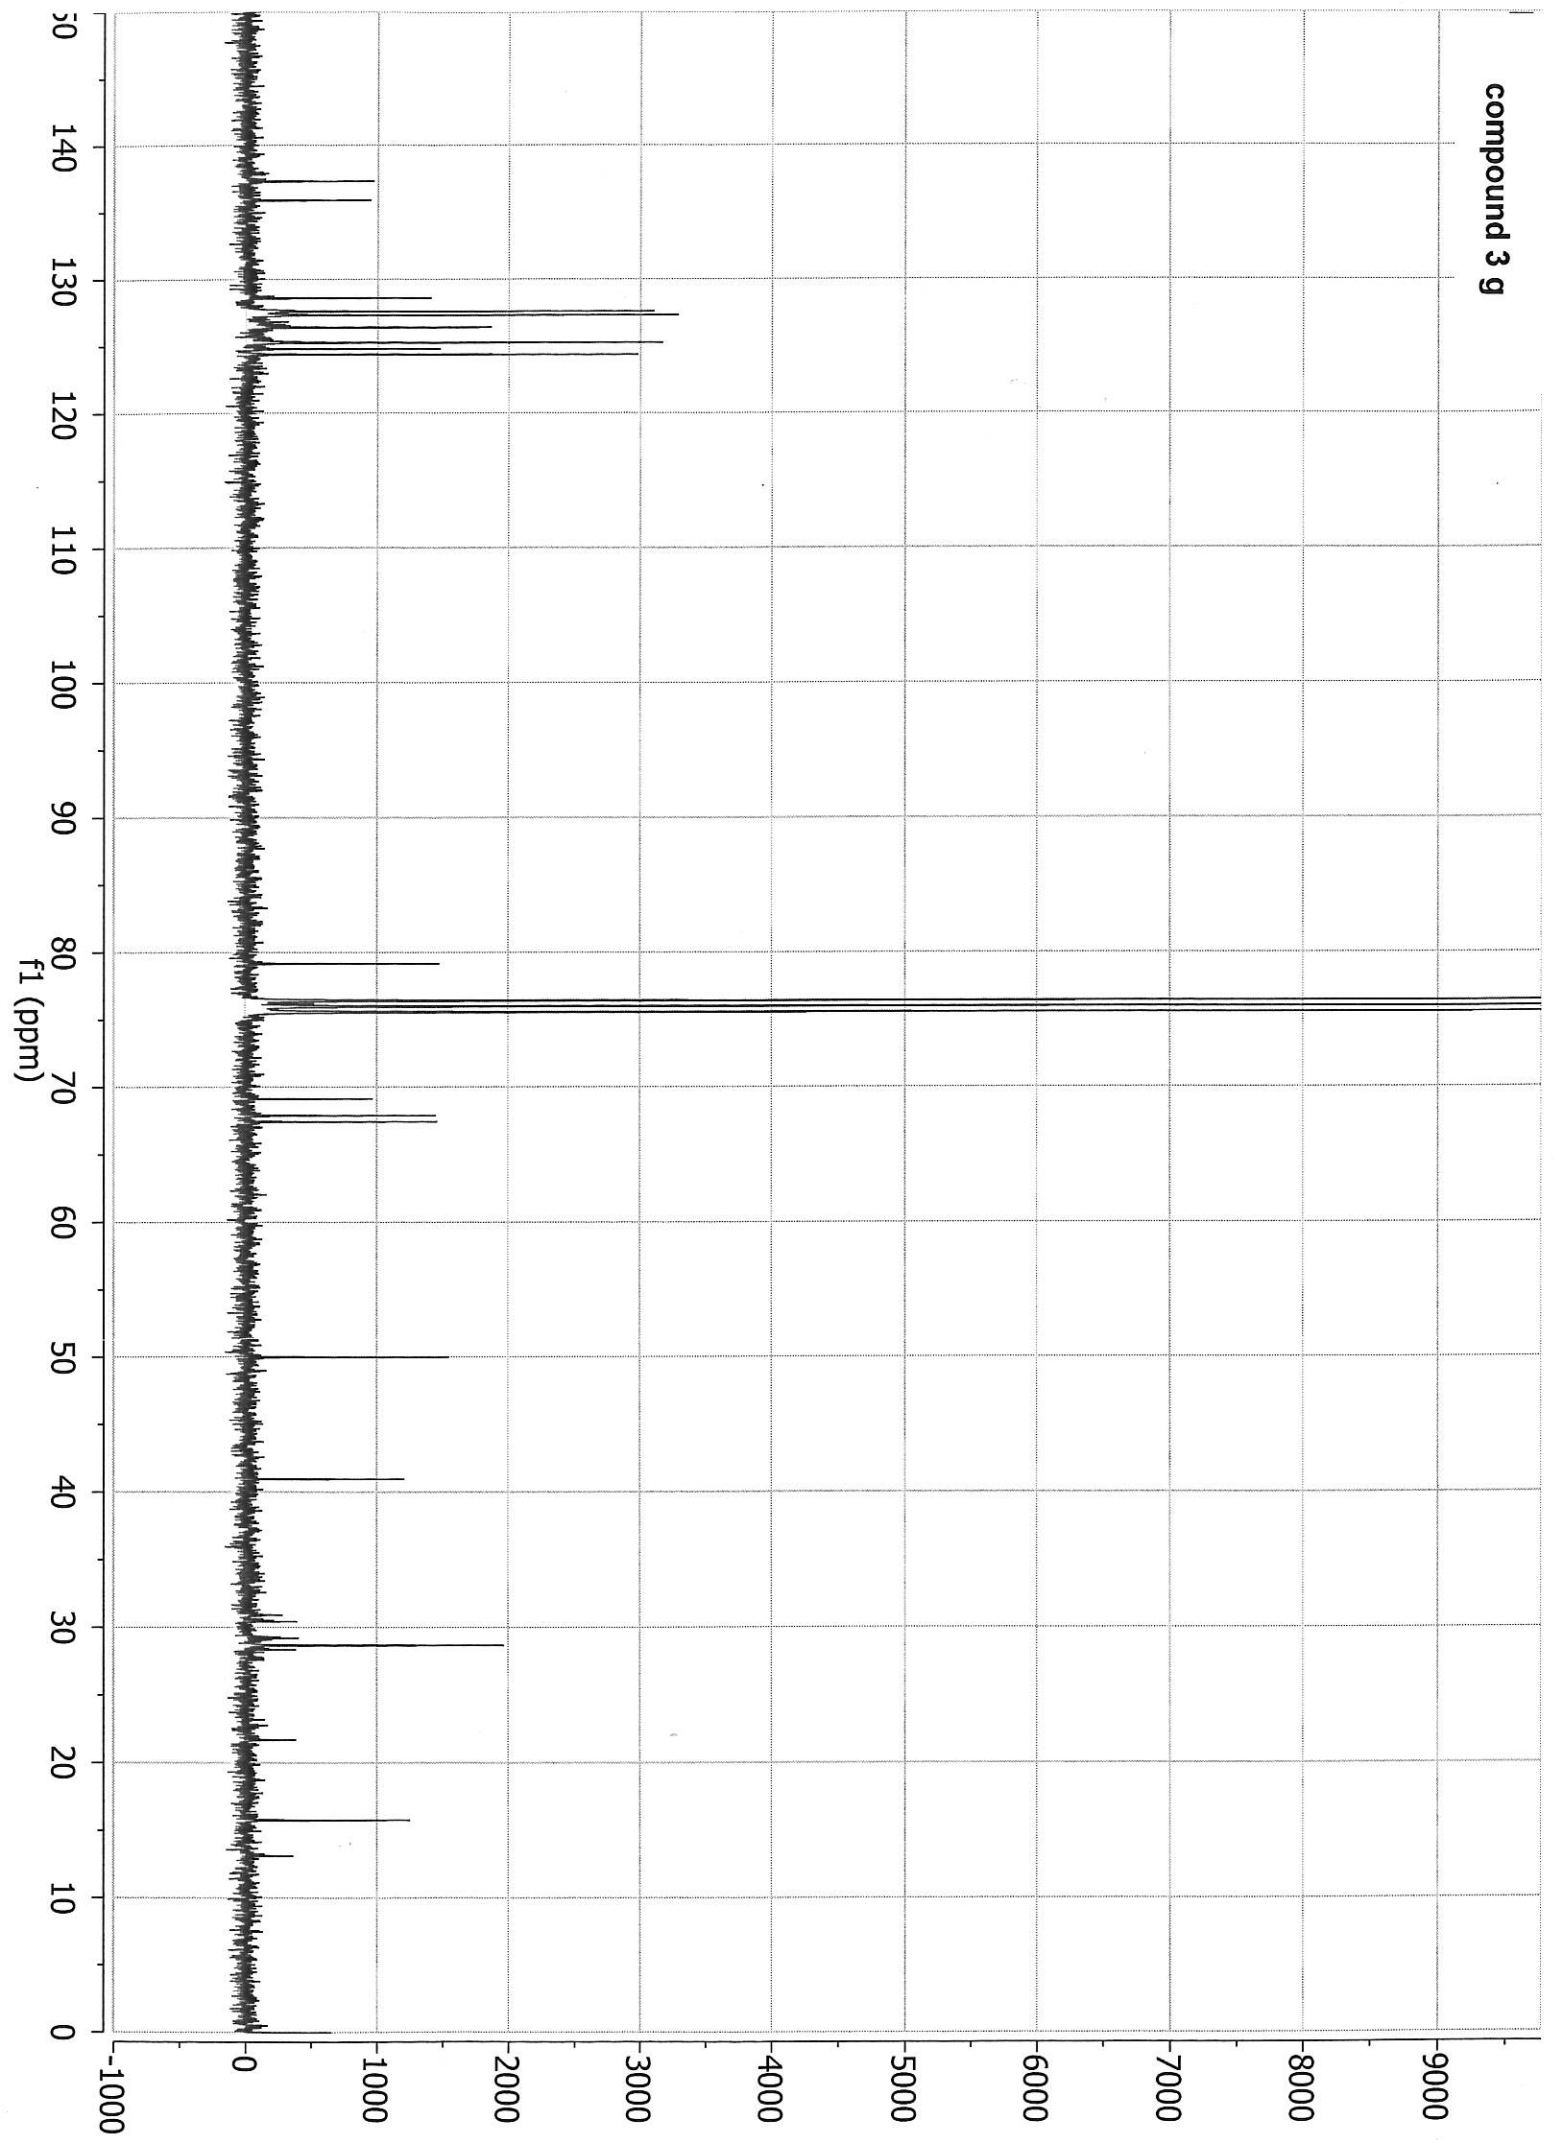

[D]-5b and [D]-5b'

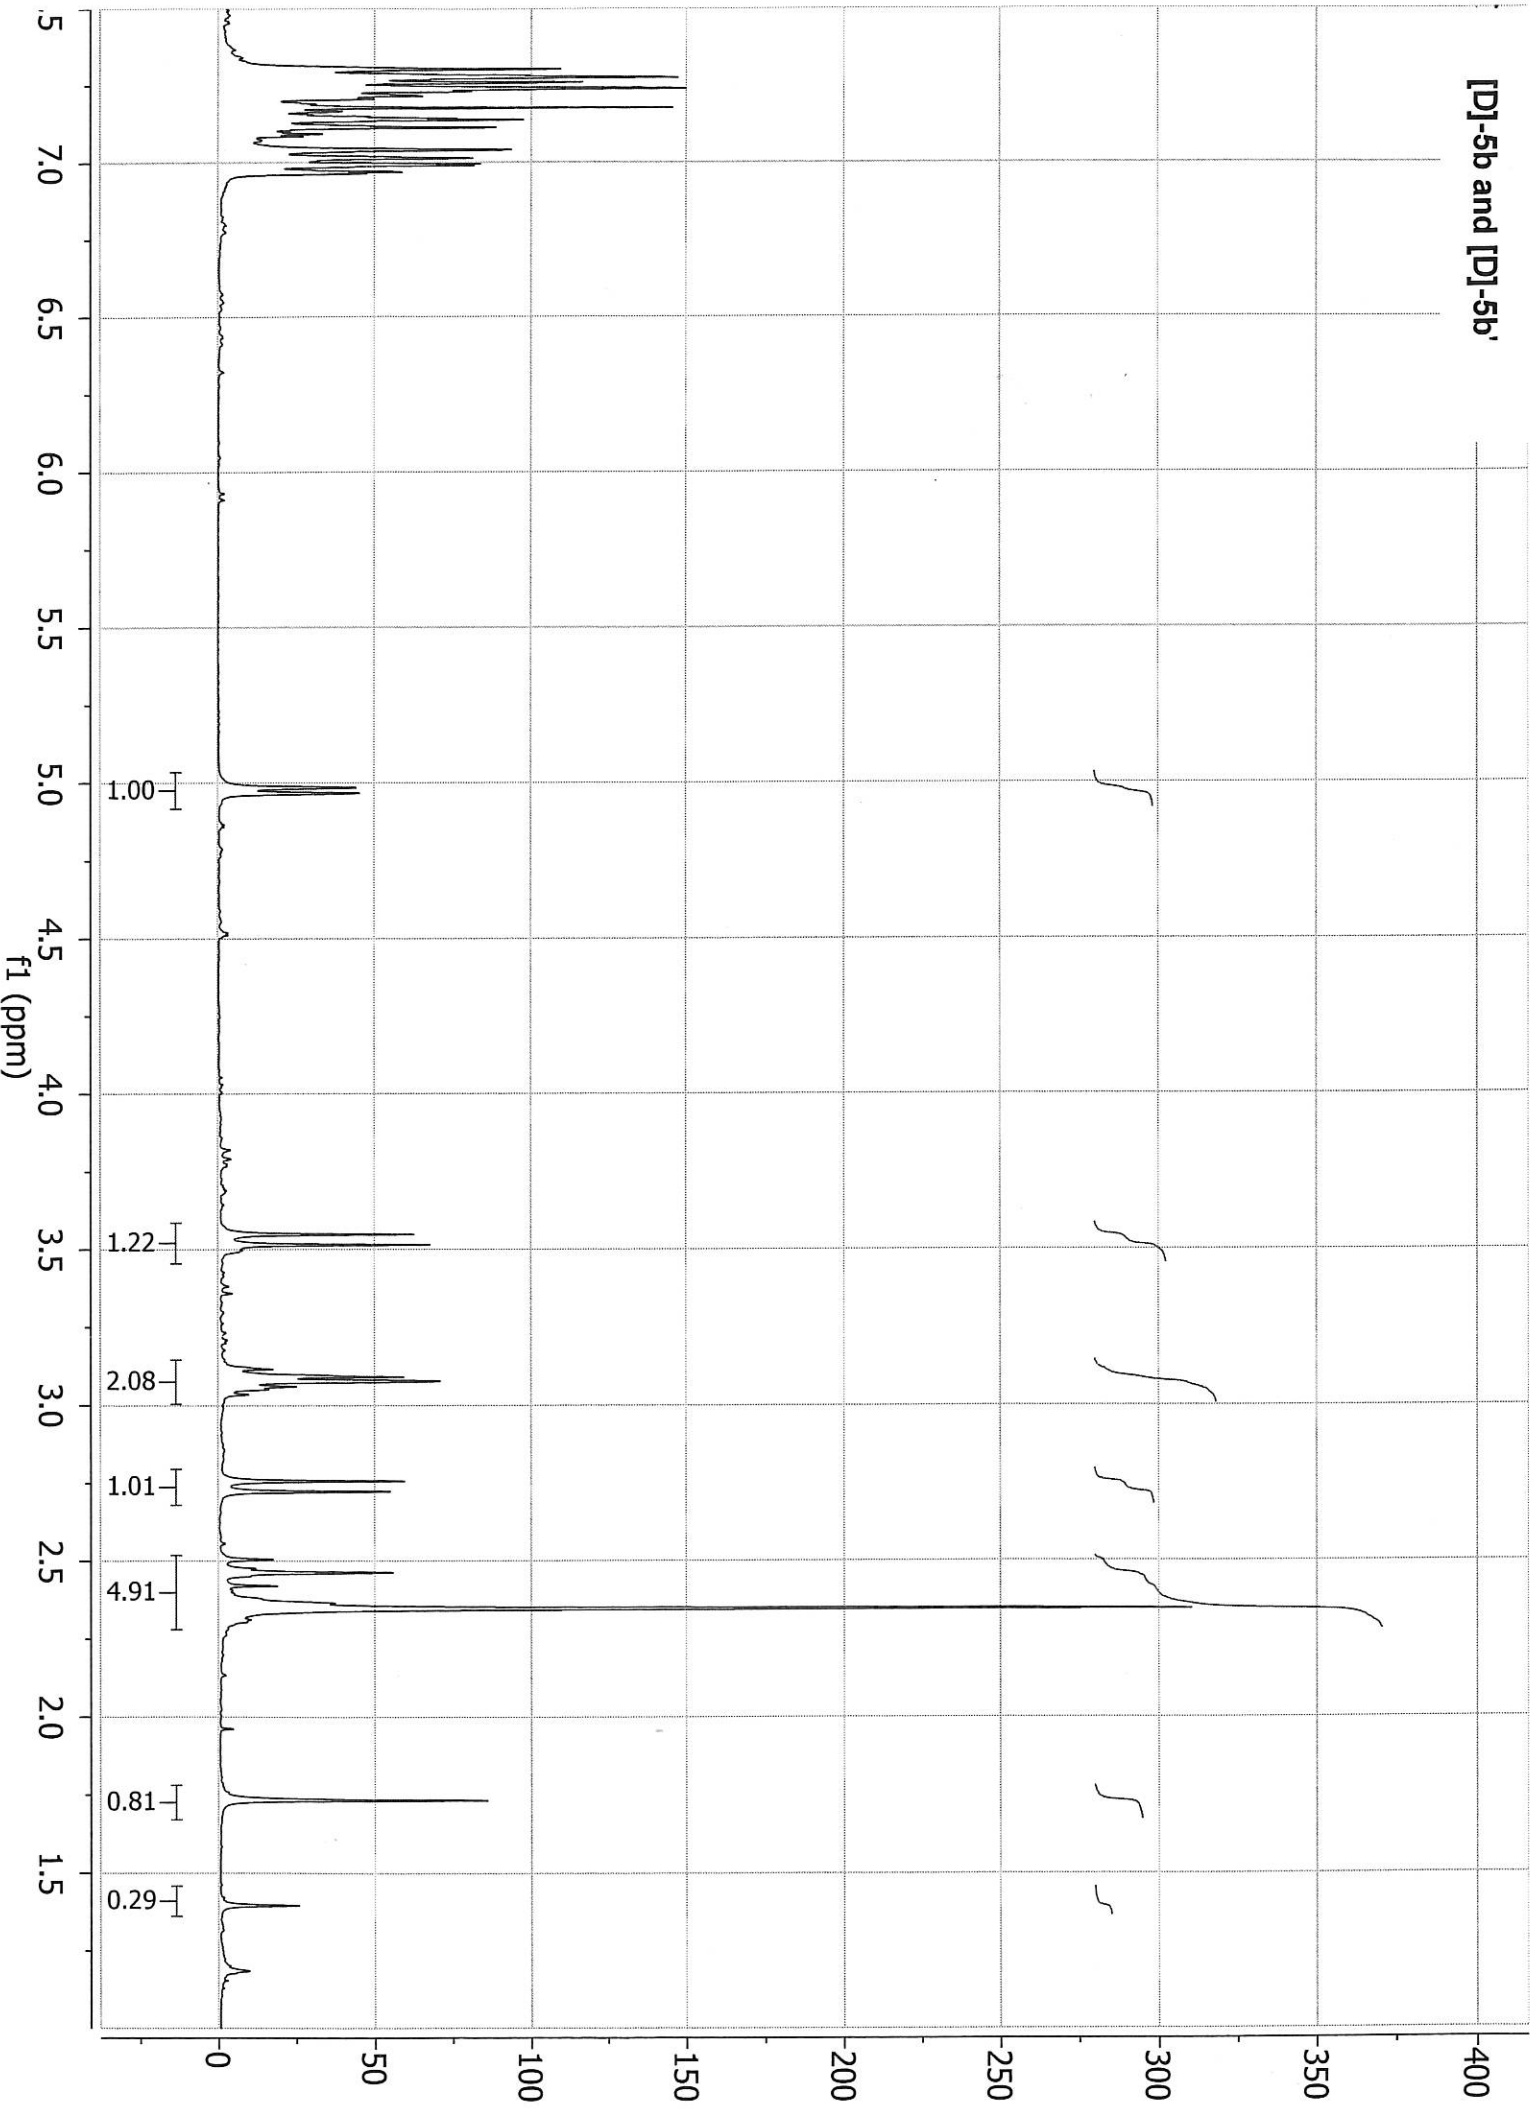



[D]-5b and [D]-5b

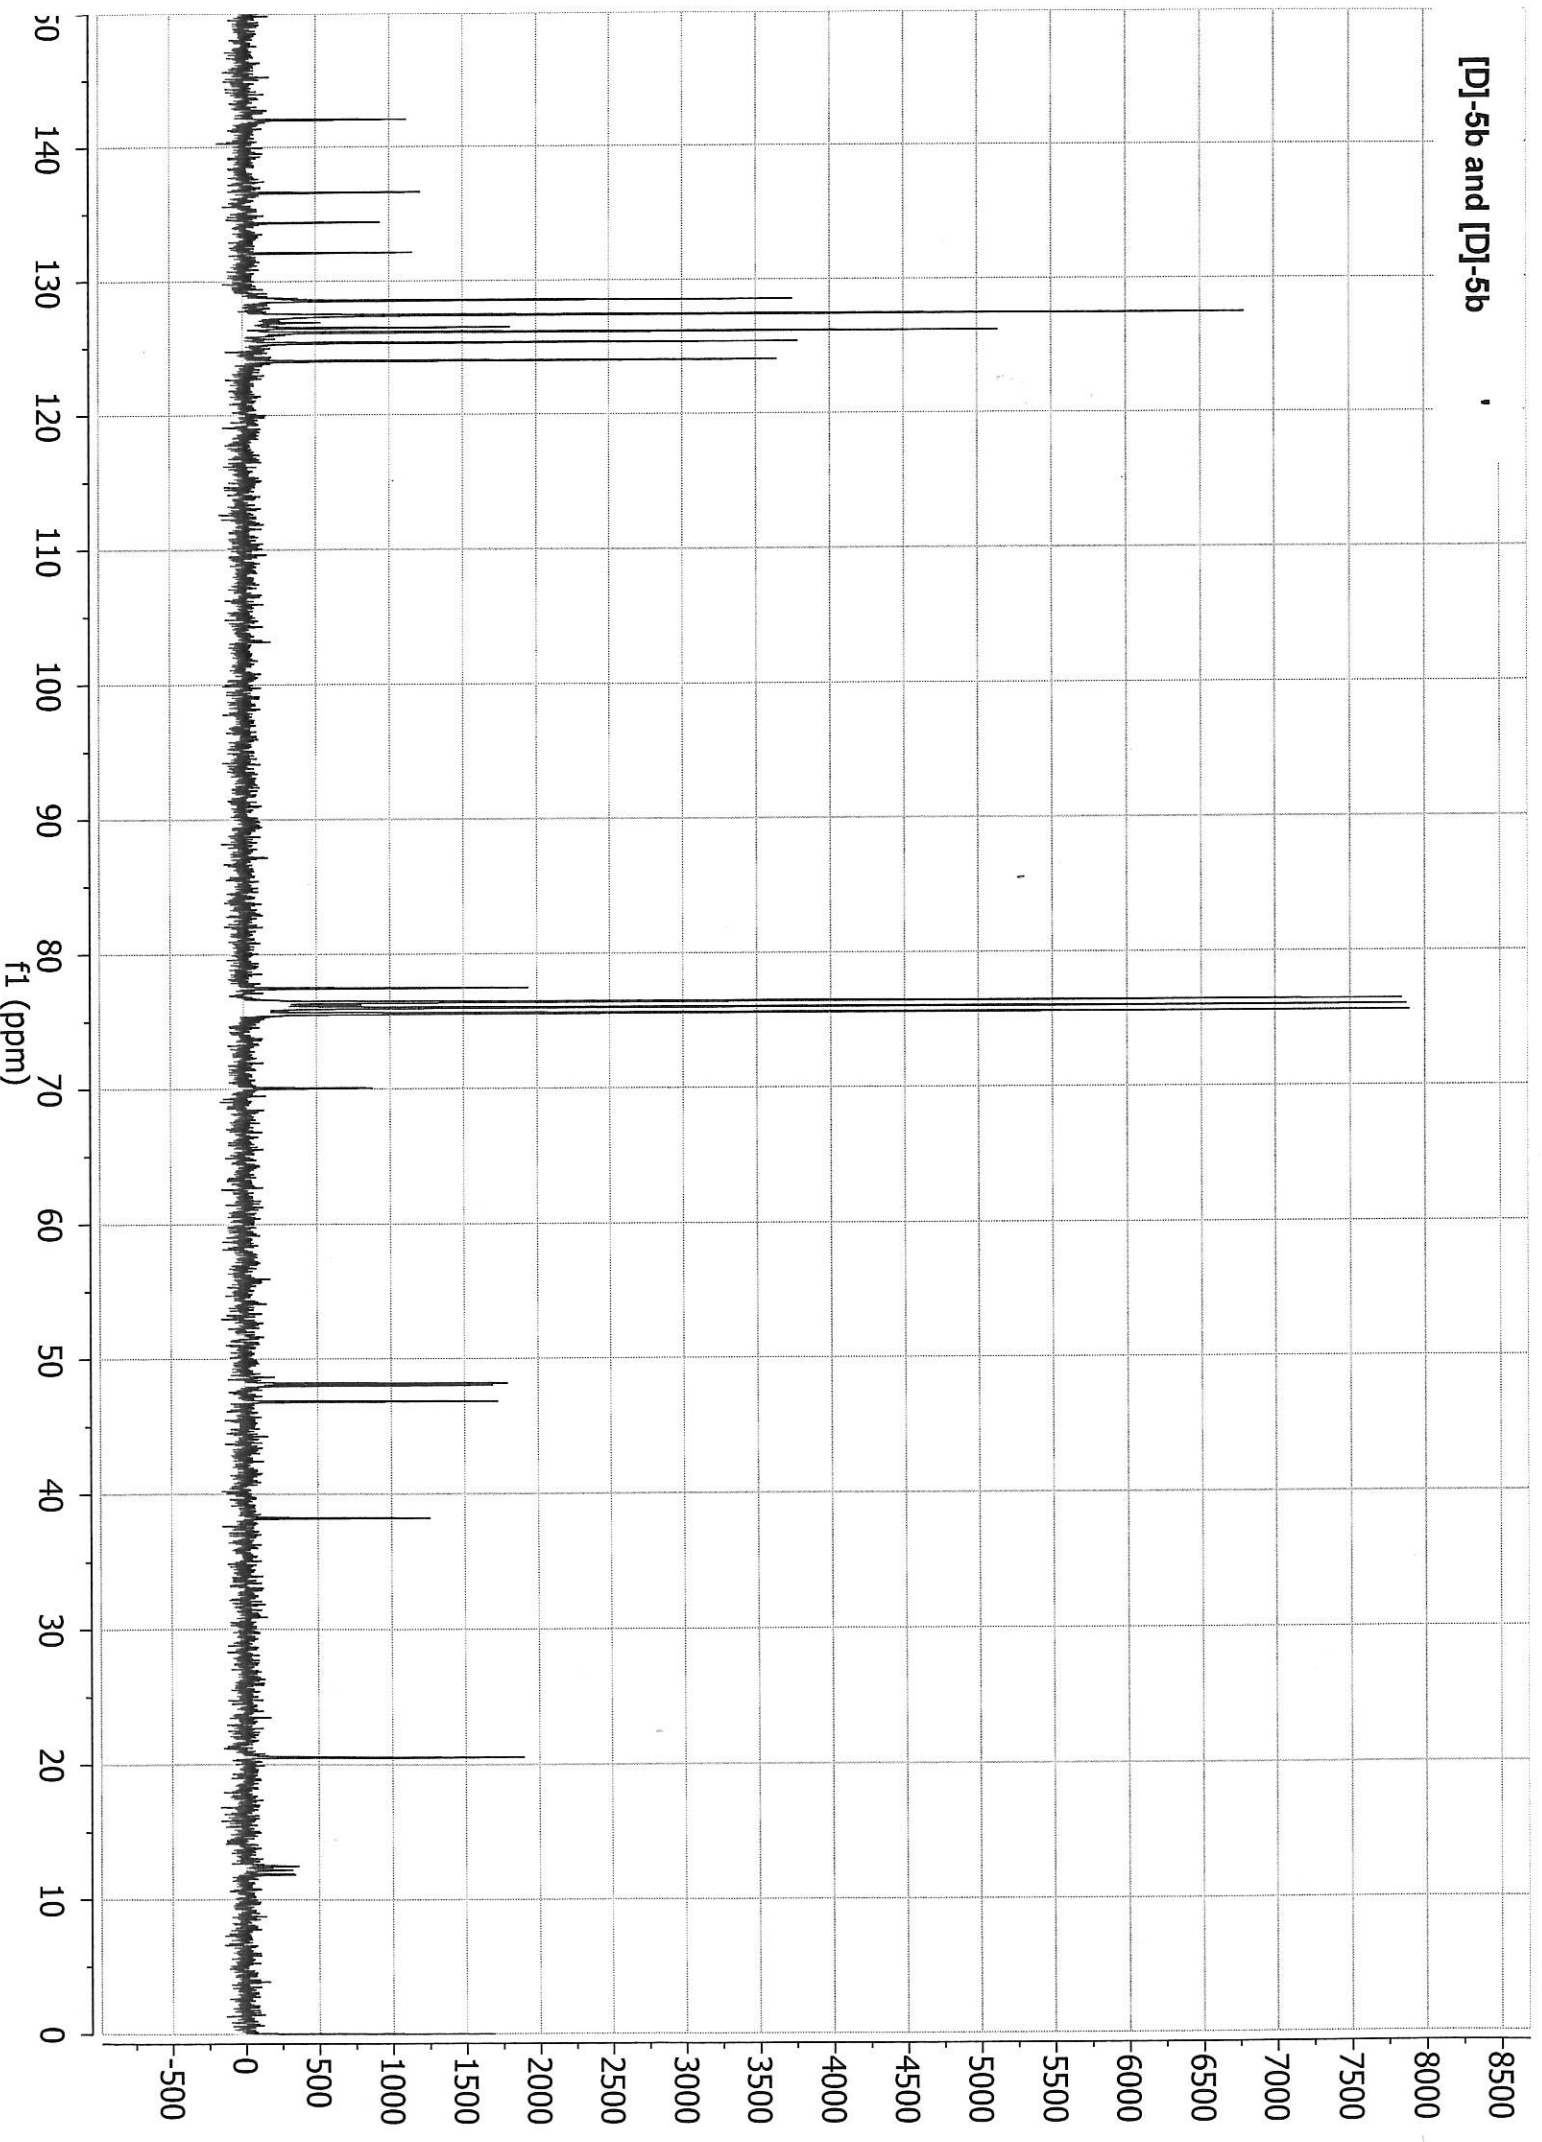

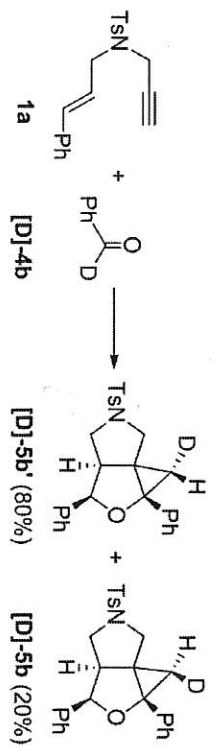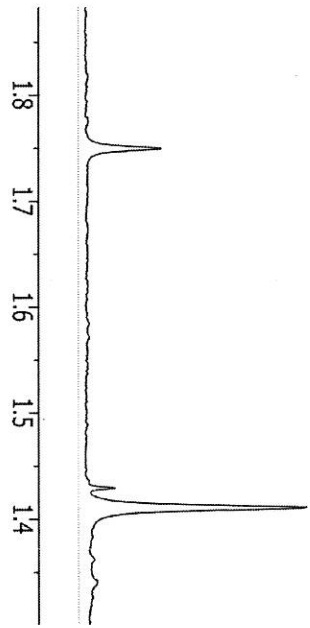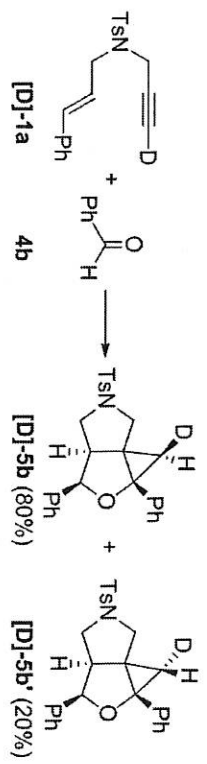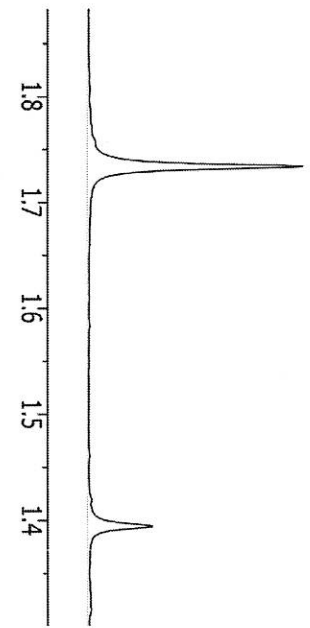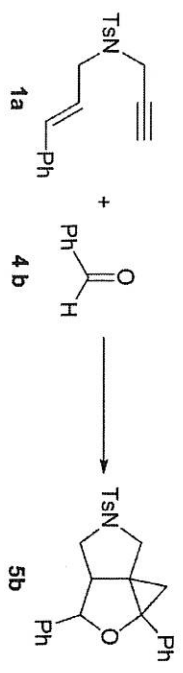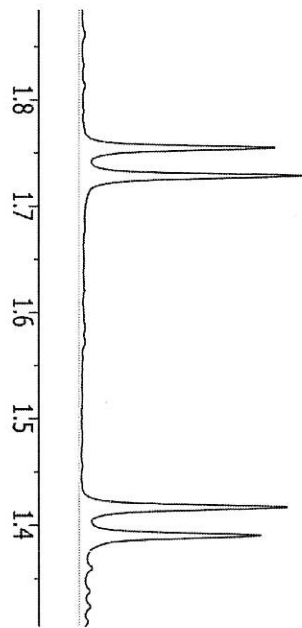

## 6. References

- [1] K. Fourmy, S. Mallet-Ladeira, O. Dechy-Cabaret and M. Gouygou, *Dalton Trans.* **2014**, *43*, 6728-6734.
- [2] K. Miura, H. Saito, N. Fujisawa and A. Hosomi, *J. Org. Chem.* **2000**, *65*, 8119-8122.
- [3] K. T. Sylvester and P. J. Chirik, *J. Am. Chem. Soc.* **2009**, *131*, 8772-8774.
- [4] A. Fürstner, F. Stelzer and H. Szillat, *J. Am. Chem. Soc.* **2001**, *123*, 11863-11869.
- [5] T. Morimoto, K. Fuji, K. Tsutsumi and K. Kakiuchi, *J. Am. Chem. Soc.* **2002**, *124*, 3806-3807.
- [6] J. T. Spletstoser, J. M. White and G. I. Georg, *Tetrahedron Lett.* **2004**, *45*, 2787-2789.
- [7] a) K.-G. Ji, J. Chen, H.-T. Zhu, F. Yang, A. Shaukat and Y.-M. Liang, *Chem. Eur. J.* **2011**, *17*, 305-311; b) K.-G. Ji, X.-Z. Shu, S.-C. Zhao, H.-T. Zhu, Y.-N. Niu, X.-Y. Liu and Y.-M. Liang, *Org. Lett.* **2009**, *11*, 3206-3209.
